# Supplementary material
Source: publisher figshare collection journal article supplement (https://frontiersin.figshare.com/ndownloader/files/31376017)
Supplement: Supplementary file 1 [file 31376017]

Archive with 12 entries (11 files):
- Source_code/
- Source_code/domain.dat
- Source_code/forLoop.m
- Source_code/icecap.m
- Source_code/land_factor.m
- Source_code/make_plot.m
- Source_code/mask.dat
- Source_code/params.m
- Source_code/readSpatialData.m
- Source_code/SMB.m
- Source_code/SMB_DD.m
- Source_code/SMB_KO.m
