# Supplementary material
Source: publisher figshare collection journal article supplement (https://frontiersin.figshare.com/ndownloader/files/31376017)
Supplement: Supplementary file 1 [file 31376017 › Source_code/domain.dat]

1504	1507	1512	1516	1534	1545	1556	1570	1602	1615	1625	1631	1636	1647	1654	1660	1669	1668	1643	1629	1619	1613	1594	1586	1578	1572	1567	1562	1559	1549	1529	1512	1471	1457	1443	1430	1412	1405	1399	1392	1391	1393	1394	1395	1398	1402	1397	1390	1387	1399
1504	1508	1514	1519	1536	1549	1560	1578	1602	1615	1625	1631	1650	1662	1672	1677	1682	1674	1651	1641	1633	1627	1605	1596	1584	1572	1566	1560	1558	1554	1537	1520	1477	1463	1450	1435	1410	1399	1391	1384	1377	1377	1378	1379	1381	1402	1397	1390	1387	1383
1502	1506	1513	1526	1536	1549	1560	1578	1614	1633	1646	1653	1657	1669	1678	1684	1683	1668	1658	1652	1643	1634	1608	1600	1588	1576	1568	1552	1549	1544	1531	1493	1473	1463	1453	1437	1406	1395	1386	1379	1377	1377	1378	1379	1381	1386	1381	1376	1371	1369
1502	1506	1513	1526	1536	1547	1558	1573	1602	1616	1627	1635	1647	1668	1673	1672	1671	1659	1652	1647	1639	1628	1599	1589	1581	1569	1561	1535	1532	1526	1512	1485	1467	1455	1446	1430	1406	1395	1386	1379	1370	1363	1365	1367	1368	1372	1369	1363	1359	1355
1500	1504	1509	1522	1531	1538	1550	1563	1587	1600	1613	1622	1647	1653	1656	1655	1652	1647	1640	1633	1626	1618	1591	1578	1562	1551	1524	1514	1512	1507	1496	1485	1467	1455	1446	1430	1407	1395	1385	1377	1361	1349	1349	1353	1355	1357	1354	1349	1345	1340
1498	1501	1508	1519	1524	1531	1539	1565	1575	1588	1600	1609	1633	1638	1640	1640	1638	1631	1626	1619	1612	1605	1584	1572	1553	1538	1512	1514	1512	1507	1496	1476	1460	1450	1439	1424	1403	1394	1385	1375	1359	1345	1335	1336	1339	1339	1336	1331	1327	1324
1497	1499	1505	1514	1519	1525	1531	1553	1562	1574	1584	1594	1613	1619	1622	1622	1620	1614	1608	1601	1595	1580	1584	1572	1553	1538	1512	1506	1499	1490	1480	1465	1453	1444	1435	1414	1401	1388	1379	1371	1350	1340	1326	1322	1323	1323	1321	1316	1313	1306
1497	1498	1507	1510	1514	1520	1526	1539	1548	1561	1572	1581	1594	1599	1601	1601	1598	1594	1608	1601	1595	1580	1571	1562	1548	1530	1502	1492	1483	1473	1467	1449	1440	1432	1424	1402	1392	1382	1375	1361	1337	1331	1320	1311	1307	1307	1304	1301	1298	1288
1496	1498	1505	1507	1510	1517	1522	1530	1538	1551	1561	1568	1579	1599	1601	1601	1598	1594	1591	1584	1578	1566	1557	1548	1535	1519	1491	1478	1468	1458	1443	1434	1428	1418	1408	1390	1376	1365	1358	1348	1326	1317	1310	1307	1290	1291	1289	1286	1283	1273
1495	1496	1503	1504	1506	1511	1518	1528	1531	1551	1561	1573	1579	1584	1587	1586	1583	1580	1575	1569	1563	1552	1544	1535	1521	1495	1485	1472	1458	1446	1430	1420	1414	1405	1395	1376	1365	1354	1346	1336	1320	1310	1301	1299	1279	1276	1289	1286	1283	1273
1494	1494	1500	1501	1506	1511	1518	1528	1531	1540	1547	1558	1562	1567	1571	1570	1567	1563	1558	1553	1546	1534	1525	1517	1505	1481	1472	1462	1450	1435	1417	1408	1397	1389	1381	1359	1350	1342	1333	1316	1309	1302	1301	1299	1279	1276	1277	1273	1269	1260
1494	1494	1500	1501	1502	1506	1517	1521	1527	1530	1536	1545	1548	1552	1554	1554	1549	1544	1539	1534	1521	1514	1505	1499	1487	1467	1457	1448	1437	1422	1405	1397	1383	1374	1354	1346	1337	1342	1333	1316	1309	1302	1291	1288	1272	1262	1257	1258	1254	1244
1491	1493	1495	1497	1498	1499	1504	1509	1517	1522	1527	1534	1538	1541	1542	1541	1535	1530	1524	1515	1503	1496	1487	1480	1472	1453	1443	1434	1425	1410	1394	1384	1370	1374	1354	1346	1337	1328	1318	1304	1298	1286	1277	1276	1263	1252	1242	1241	1233	1230
1486	1491	1492	1491	1493	1493	1496	1497	1505	1510	1515	1522	1525	1528	1529	1523	1519	1515	1508	1499	1485	1479	1470	1461	1451	1438	1426	1417	1425	1397	1394	1384	1370	1362	1342	1335	1326	1317	1309	1293	1287	1278	1272	1259	1253	1248	1236	1229	1225	1223
1482	1485	1485	1485	1487	1489	1493	1493	1498	1500	1503	1509	1513	1514	1515	1510	1506	1500	1495	1485	1468	1459	1448	1441	1451	1438	1426	1417	1408	1385	1377	1365	1355	1349	1329	1321	1314	1306	1299	1282	1273	1266	1260	1248	1242	1238	1231	1223	1216	1216
1478	1479	1479	1480	1483	1484	1486	1488	1490	1491	1496	1500	1503	1504	1504	1497	1494	1488	1483	1485	1468	1459	1448	1441	1429	1419	1410	1401	1393	1373	1362	1351	1344	1339	1318	1311	1302	1292	1278	1270	1261	1252	1247	1239	1233	1228	1226	1224	1210	1210
1471	1470	1470	1471	1474	1477	1479	1482	1482	1483	1486	1488	1491	1493	1492	1497	1494	1488	1483	1475	1456	1447	1435	1426	1410	1404	1395	1387	1380	1363	1353	1345	1338	1332	1313	1304	1293	1283	1265	1259	1254	1246	1240	1231	1226	1222	1220	1219	1210	1207
1463	1458	1461	1462	1463	1467	1467	1470	1472	1474	1486	1488	1491	1493	1492	1482	1477	1472	1469	1453	1445	1436	1423	1412	1395	1388	1379	1370	1364	1349	1342	1334	1328	1312	1304	1295	1284	1273	1254	1247	1243	1236	1232	1224	1222	1217	1215	1217	1210	1207
1457	1447	1449	1452	1455	1457	1467	1470	1472	1474	1478	1478	1478	1479	1478	1472	1464	1457	1454	1440	1431	1421	1410	1401	1380	1372	1364	1357	1350	1337	1330	1323	1317	1303	1295	1286	1278	1268	1245	1237	1234	1229	1224	1224	1222	1217	1215	1211	1209	1206
1446	1447	1449	1452	1455	1457	1458	1459	1461	1464	1469	1470	1468	1466	1465	1462	1454	1449	1442	1427	1419	1409	1398	1388	1366	1360	1352	1345	1332	1326	1321	1313	1307	1293	1287	1281	1273	1260	1245	1237	1234	1229	1219	1216	1215	1213	1211	1207	1205	1202
1446	1440	1438	1440	1444	1446	1447	1448	1449	1453	1457	1457	1457	1454	1449	1447	1443	1438	1431	1412	1402	1394	1385	1375	1356	1348	1339	1333	1319	1313	1309	1302	1293	1279	1287	1281	1273	1260	1241	1234	1228	1225	1214	1210	1208	1207	1205	1201	1200	1198
1438	1435	1431	1430	1434	1435	1437	1438	1438	1442	1444	1445	1444	1442	1435	1432	1429	1425	1421	1397	1388	1380	1372	1353	1344	1336	1329	1323	1308	1313	1309	1302	1293	1279	1273	1268	1260	1241	1235	1230	1224	1220	1211	1208	1203	1200	1199	1194	1194	1193
1434	1430	1428	1426	1426	1426	1428	1427	1428	1431	1433	1433	1434	1432	1422	1417	1414	1412	1407	1389	1381	1371	1360	1343	1335	1336	1329	1323	1308	1303	1298	1291	1278	1267	1261	1257	1250	1237	1234	1228	1221	1216	1207	1204	1196	1193	1192	1188	1185	1182
1427	1425	1422	1420	1417	1418	1419	1417	1418	1420	1421	1421	1420	1418	1410	1405	1400	1395	1383	1376	1381	1371	1360	1343	1335	1329	1320	1312	1301	1296	1288	1280	1266	1259	1254	1249	1242	1231	1231	1224	1219	1215	1206	1201	1196	1191	1189	1185	1181	1179
1424	1419	1416	1413	1411	1412	1409	1410	1409	1408	1410	1409	1409	1407	1399	1394	1400	1395	1383	1376	1369	1360	1351	1335	1324	1318	1311	1302	1290	1283	1278	1271	1260	1253	1246	1242	1237	1229	1224	1221	1219	1213	1205	1201	1198	1194	1183	1180	1177	1177
1420	1419	1416	1410	1407	1406	1404	1404	1404	1402	1402	1409	1409	1403	1399	1394	1389	1383	1370	1362	1357	1349	1341	1328	1317	1308	1301	1288	1279	1272	1269	1263	1254	1247	1241	1237	1234	1227	1222	1219	1217	1209	1204	1200	1197	1195	1183	1180	1177	1177
1422	1419	1417	1414	1406	1399	1398	1404	1404	1402	1402	1400	1399	1395	1390	1385	1380	1375	1363	1355	1350	1342	1333	1320	1312	1303	1297	1277	1270	1266	1263	1258	1248	1242	1239	1235	1230	1226	1221	1218	1214	1209	1203	1197	1197	1195	1183	1180	1177	1172
1432	1423	1417	1414	1406	1399	1398	1398	1397	1396	1395	1391	1390	1386	1383	1380	1374	1367	1356	1351	1344	1336	1321	1312	1302	1299	1290	1269	1261	1258	1257	1254	1242	1240	1236	1232	1224	1221	1215	1212	1214	1209	1203	1197	1196	1193	1184	1181	1177	1171
1432	1423	1416	1410	1408	1404	1398	1393	1391	1389	1389	1386	1382	1378	1375	1372	1368	1362	1351	1345	1336	1329	1316	1308	1299	1293	1286	1265	1258	1253	1250	1248	1237	1234	1229	1232	1224	1221	1215	1212	1210	1202	1199	1198	1194	1190	1184	1179	1174	1169
1438	1429	1422	1413	1407	1403	1399	1393	1385	1382	1379	1376	1375	1371	1367	1365	1362	1350	1344	1336	1331	1326	1313	1305	1296	1287	1279	1264	1258	1252	1248	1243	1237	1234	1229	1223	1217	1213	1209	1206	1204	1199	1194	1191	1189	1184	1180	1171	1166	1167
1439	1431	1426	1417	1410	1404	1398	1393	1384	1377	1370	1365	1362	1360	1359	1356	1354	1344	1338	1333	1329	1321	1304	1299	1287	1285	1279	1264	1258	1252	1248	1238	1235	1229	1223	1218	1211	1207	1204	1202	1200	1196	1193	1190	1187	1182	1173	1167	1165	1166
1441	1435	1429	1419	1412	1406	1401	1393	1382	1377	1372	1365	1355	1350	1347	1342	1338	1336	1330	1324	1319	1309	1304	1299	1287	1285	1270	1261	1256	1251	1246	1232	1228	1223	1216	1213	1207	1202	1198	1199	1195	1192	1190	1186	1183	1172	1167	1166	1166	1166
1449	1442	1436	1422	1415	1411	1402	1388	1380	1375	1369	1362	1355	1347	1343	1337	1329	1336	1330	1324	1319	1309	1295	1292	1284	1277	1266	1259	1251	1246	1240	1222	1219	1214	1208	1207	1200	1198	1196	1193	1190	1187	1184	1180	1173	1166	1165	1166	1166	1166
1454	1447	1442	1427	1419	1413	1404	1390	1382	1375	1368	1361	1351	1347	1343	1337	1329	1318	1316	1313	1306	1292	1288	1282	1277	1268	1256	1250	1241	1231	1224	1211	1210	1206	1203	1197	1196	1195	1193	1190	1184	1180	1179	1172	1167	1165	1167	1168	1167	1166
1453	1449	1437	1428	1419	1412	1405	1393	1382	1375	1368	1361	1351	1346	1342	1336	1320	1309	1296	1294	1291	1280	1275	1269	1263	1258	1242	1235	1226	1217	1210	1201	1201	1198	1197	1191	1191	1192	1190	1186	1176	1170	1168	1167	1166	1165	1167	1168	1167	1166
1454	1447	1433	1422	1419	1412	1405	1393	1384	1378	1369	1362	1352	1345	1337	1332	1312	1307	1287	1272	1271	1268	1261	1255	1250	1243	1227	1221	1214	1207	1198	1194	1193	1193	1190	1189	1189	1187	1186	1184	1170	1170	1168	1167	1165	1166	1167	1167	1165	1165
1454	1447	1433	1422	1415	1408	1402	1390	1385	1376	1368	1356	1352	1345	1334	1329	1308	1299	1287	1271	1262	1251	1246	1242	1239	1227	1217	1212	1207	1201	1194	1191	1189	1188	1186	1185	1189	1187	1186	1184	1170	1168	1167	1166	1166	1167	1167	1167	1166	1166
1459	1452	1438	1430	1418	1409	1405	1388	1382	1375	1368	1352	1346	1341	1331	1323	1305	1297	1287	1275	1269	1245	1236	1231	1227	1218	1211	1205	1200	1195	1190	1190	1189	1188	1186	1185	1185	1184	1182	1173	1168	1167	1166	1165	1167	1168	1168	1167	1166	1166
1458	1451	1440	1433	1423	1416	1400	1395	1386	1376	1369	1351	1345	1339	1331	1323	1303	1298	1285	1278	1257	1246	1236	1227	1216	1208	1204	1205	1200	1195	1190	1190	1188	1184	1176	1175	1174	1174	1173	1169	1166	1166	1167	1167	1168	1168	1168	1168	1167	1166
1455	1449	1436	1430	1421	1414	1398	1392	1384	1375	1367	1351	1345	1338	1327	1319	1301	1291	1282	1271	1248	1238	1230	1227	1216	1208	1204	1200	1195	1194	1190	1187	1185	1180	1171	1170	1169	1168	1168	1167	1167	1168	1168	1167	1167	1168	1168	1168	1166	1166
1450	1435	1431	1425	1417	1408	1392	1386	1378	1371	1365	1351	1344	1336	1324	1307	1295	1285	1282	1271	1248	1238	1230	1222	1213	1202	1198	1196	1194	1191	1188	1183	1179	1173	1169	1168	1168	1168	1168	1169	1170	1169	1168	1168	1168	1169	1169	1168	1169	1168
1444	1426	1422	1418	1409	1402	1385	1380	1374	1369	1365	1348	1340	1329	1324	1307	1295	1285	1272	1262	1240	1229	1222	1213	1207	1196	1194	1194	1192	1189	1182	1175	1172	1170	1168	1168	1168	1168	1170	1175	1173	1170	1168	1169	1168	1169	1170	1170	1170	1171
1440	1421	1417	1410	1400	1394	1379	1375	1371	1369	1357	1348	1340	1329	1318	1296	1286	1275	1265	1254	1228	1219	1212	1207	1196	1192	1189	1190	1191	1188	1180	1173	1170	1169	1168	1168	1168	1169	1175	1176	1174	1171	1169	1169	1169	1170	1171	1170	1170	1171
1450	1419	1410	1399	1389	1394	1379	1375	1371	1366	1350	1341	1332	1321	1310	1288	1276	1265	1254	1246	1222	1213	1207	1202	1191	1187	1185	1186	1187	1180	1175	1173	1170	1169	1168	1168	1168	1169	1176	1175	1173	1170	1169	1169	1169	1170	1171	1171	1173	1177
1450	1419	1410	1399	1389	1376	1371	1368	1362	1357	1341	1331	1322	1311	1299	1280	1268	1257	1248	1232	1220	1210	1204	1198	1187	1180	1179	1179	1179	1173	1171	1170	1169	1169	1169	1168	1168	1168	1176	1175	1173	1170	1169	1170	1170	1171	1171	1174	1181	1182
1450	1406	1400	1386	1379	1371	1365	1361	1354	1349	1330	1320	1311	1301	1290	1271	1262	1254	1244	1227	1218	1209	1200	1193	1182	1176	1174	1174	1172	1170	1170	1169	1169	1169	1169	1168	1168	1168	1175	1175	1171	1170	1169	1171	1171	1172	1174	1181	1185	1185
1405	1396	1391	1377	1372	1365	1358	1351	1347	1338	1321	1312	1304	1295	1274	1265	1256	1249	1239	1219	1211	1204	1198	1191	1177	1175	1174	1173	1171	1170	1170	1169	1169	1168	1169	1169	1168	1168	1170	1174	1173	1169	1171	1171	1173	1174	1178	1184	1187	1188
1390	1385	1380	1368	1363	1355	1349	1343	1337	1328	1312	1304	1297	1286	1267	1260	1249	1243	1235	1213	1208	1198	1192	1187	1177	1175	1174	1173	1171	1170	1169	1169	1169	1168	1170	1169	1169	1169	1169	1171	1172	1171	1172	1173	1174	1176	1184	1189	1189	1191
1377	1375	1369	1357	1354	1344	1338	1331	1325	1311	1303	1296	1287	1277	1258	1250	1237	1233	1226	1206	1208	1198	1192	1179	1175	1176	1174	1171	1169	1170	1171	1170	1169	1169	1171	1171	1170	1171	1171	1172	1175	1175	1175	1179	1183	1184	1187	1195	1197	1197
1365	1361	1350	1343	1344	1335	1329	1324	1315	1302	1296	1285	1277	1266	1249	1250	1237	1233	1226	1206	1201	1193	1188	1181	1177	1174	1173	1172	1171	1170	1170	1171	1170	1171	1171	1173	1174	1175	1175	1177	1180	1181	1182	1185	1188	1191	1194	1201	1204	1208
1347	1341	1338	1335	1328	1322	1317	1312	1306	1293	1286	1285	1277	1266	1249	1237	1226	1222	1206	1199	1194	1189	1187	1178	1175	1172	1171	1171	1171	1170	1170	1171	1171	1172	1172	1173	1177	1181	1181	1183	1185	1186	1187	1188	1191	1194	1202	1206	1204	1208
1337	1333	1330	1327	1317	1310	1317	1312	1306	1293	1286	1273	1264	1255	1238	1228	1220	1214	1199	1194	1190	1188	1187	1174	1174	1171	1171	1171	1171	1172	1171	1172	1173	1176	1177	1177	1179	1186	1186	1187	1187	1189	1191	1188	1191	1194	1202	1206	1212	1217
1328	1325	1330	1327	1317	1310	1305	1302	1296	1283	1273	1264	1256	1238	1230	1221	1213	1208	1196	1190	1188	1186	1182	1175	1174	1173	1173	1172	1172	1173	1175	1175	1179	1180	1182	1182	1182	1186	1188	1187	1187	1191	1191	1193	1196	1200	1210	1215	1221	1228
1328	1325	1324	1321	1311	1305	1300	1296	1281	1274	1262	1256	1248	1233	1226	1217	1209	1203	1193	1189	1187	1181	1177	1175	1175	1175	1174	1172	1173	1174	1180	1181	1184	1185	1182	1182	1182	1186	1188	1190	1191	1194	1195	1197	1200	1206	1218	1224	1231	1238
1320	1317	1316	1312	1306	1301	1295	1289	1274	1267	1257	1247	1240	1226	1221	1211	1203	1198	1189	1188	1182	1180	1175	1175	1178	1177	1175	1174	1176	1178	1180	1181	1184	1185	1185	1185	1185	1187	1190	1193	1195	1199	1199	1202	1207	1213	1226	1234	1241	1247
1313	1309	1308	1302	1298	1295	1291	1283	1266	1261	1252	1243	1236	1221	1215	1207	1200	1194	1188	1186	1182	1179	1179	1176	1179	1177	1175	1174	1176	1178	1183	1187	1189	1191	1191	1191	1190	1192	1194	1196	1199	1203	1205	1209	1214	1222	1236	1244	1251	1260
1310	1305	1302	1296	1291	1290	1288	1279	1261	1255	1248	1241	1233	1218	1211	1204	1198	1189	1184	1182	1180	1179	1179	1176	1179	1180	1178	1180	1182	1183	1188	1193	1195	1196	1196	1196	1195	1194	1197	1201	1205	1209	1212	1218	1223	1240	1247	1257	1265	1273
1304	1299	1295	1288	1284	1285	1281	1274	1256	1250	1243	1235	1220	1216	1208	1200	1198	1189	1184	1182	1180	1178	1182	1181	1181	1181	1182	1183	1183	1185	1190	1194	1197	1198	1200	1200	1201	1201	1202	1204	1209	1215	1220	1227	1233	1248	1257	1267	1277	1285
1297	1294	1290	1281	1278	1278	1273	1267	1252	1244	1237	1228	1220	1216	1208	1200	1197	1190	1185	1180	1178	1182	1186	1185	1184	1181	1184	1182	1184	1185	1191	1198	1202	1203	1205	1205	1208	1208	1206	1211	1221	1225	1231	1238	1243	1259	1268	1280	1289	1285
1290	1287	1284	1277	1275	1271	1266	1261	1252	1244	1237	1228	1218	1211	1205	1200	1197	1191	1184	1177	1178	1187	1188	1187	1186	1184	1183	1184	1187	1189	1194	1203	1206	1210	1211	1212	1215	1218	1216	1219	1227	1233	1241	1249	1255	1259	1268	1280	1289	1298
1282	1278	1277	1277	1275	1271	1266	1258	1250	1241	1233	1223	1215	1207	1203	1200	1197	1189	1183	1179	1179	1187	1188	1187	1188	1186	1187	1190	1194	1195	1199	1206	1210	1214	1215	1218	1221	1225	1224	1224	1227	1233	1241	1249	1255	1272	1279	1292	1302	1315
1282	1278	1274	1271	1269	1265	1261	1251	1244	1235	1227	1221	1208	1204	1201	1199	1189	1186	1186	1183	1180	1188	1188	1186	1185	1187	1191	1195	1200	1201	1204	1211	1215	1216	1218	1225	1221	1225	1224	1224	1233	1241	1249	1258	1265	1283	1290	1301	1312	1319
1272	1271	1267	1264	1261	1257	1253	1242	1235	1230	1225	1217	1206	1203	1198	1197	1193	1193	1192	1186	1182	1188	1189	1188	1187	1191	1195	1200	1204	1207	1212	1211	1215	1216	1218	1225	1227	1230	1230	1231	1244	1253	1261	1270	1286	1295	1304	1315	1322	1325
1265	1264	1259	1256	1252	1250	1246	1235	1230	1225	1220	1214	1207	1203	1199	1197	1196	1193	1190	1187	1183	1189	1192	1191	1191	1196	1198	1200	1204	1207	1212	1216	1219	1220	1223	1232	1235	1237	1239	1241	1256	1263	1271	1281	1300	1310	1321	1328	1334	1336
1257	1257	1252	1249	1246	1243	1238	1229	1221	1216	1214	1217	1213	1208	1205	1201	1193	1191	1188	1185	1186	1194	1192	1191	1191	1196	1198	1202	1208	1211	1216	1219	1222	1225	1227	1238	1243	1247	1249	1260	1268	1275	1282	1296	1316	1325	1331	1340	1347	1347
1250	1249	1246	1244	1240	1237	1229	1223	1218	1216	1219	1223	1220	1213	1207	1202	1194	1192	1188	1185	1191	1194	1195	1196	1196	1201	1203	1208	1213	1214	1220	1223	1227	1231	1242	1247	1253	1259	1264	1276	1286	1293	1301	1315	1335	1343	1351	1358	1365	1362
1246	1246	1242	1240	1237	1235	1228	1224	1222	1221	1222	1224	1220	1213	1207	1202	1194	1192	1188	1190	1198	1199	1199	1201	1201	1205	1207	1211	1217	1219	1225	1229	1234	1240	1253	1259	1265	1272	1278	1296	1307	1314	1323	1334	1351	1363	1370	1380	1383	1379
1241	1242	1239	1237	1236	1235	1230	1228	1226	1221	1222	1224	1220	1214	1208	1197	1194	1192	1192	1196	1203	1202	1201	1204	1205	1210	1214	1217	1222	1227	1231	1236	1241	1247	1262	1270	1276	1284	1292	1311	1323	1333	1342	1356	1364	1375	1370	1380	1383	1379
1237	1239	1236	1235	1236	1235	1230	1228	1226	1225	1223	1221	1216	1210	1205	1198	1194	1192	1198	1203	1206	1206	1206	1207	1210	1216	1219	1222	1227	1235	1240	1244	1251	1260	1276	1284	1291	1302	1314	1330	1340	1333	1342	1356	1364	1375	1385	1394	1398	1394
1237	1239	1236	1235	1235	1233	1231	1229	1225	1222	1216	1212	1209	1203	1200	1197	1195	1199	1204	1207	1211	1212	1211	1212	1219	1224	1226	1227	1231	1242	1249	1254	1263	1274	1291	1304	1312	1302	1321	1330	1340	1349	1358	1372	1379	1390	1400	1413	1413	1409
1232	1234	1233	1234	1233	1232	1228	1228	1225	1220	1212	1208	1205	1201	1198	1196	1197	1203	1207	1210	1214	1215	1214	1217	1224	1229	1233	1236	1239	1250	1258	1264	1263	1274	1291	1304	1312	1321	1339	1347	1356	1365	1372	1385	1393	1407	1420	1430	1437	1442
1228	1231	1232	1230	1229	1228	1227	1226	1221	1218	1209	1205	1203	1199	1197	1199	1203	1208	1211	1215	1218	1218	1221	1224	1232	1238	1243	1249	1239	1250	1258	1264	1278	1292	1305	1318	1324	1335	1352	1363	1372	1380	1385	1400	1410	1422	1433	1454	1459	1462
1223	1226	1226	1225	1224	1226	1225	1219	1212	1210	1204	1202	1201	1200	1201	1208	1210	1213	1216	1220	1223	1226	1232	1224	1232	1238	1243	1249	1252	1263	1271	1279	1286	1306	1318	1325	1336	1349	1378	1389	1393	1403	1405	1425	1434	1443	1451	1472	1478	1481
1222	1223	1223	1223	1223	1225	1221	1215	1212	1211	1207	1206	1206	1207	1212	1213	1215	1216	1220	1220	1223	1226	1232	1235	1242	1249	1254	1260	1273	1279	1285	1294	1302	1325	1332	1345	1356	1376	1422	1426	1424	1426	1443	1449	1456	1465	1474	1490	1496	1496
1223	1226	1228	1227	1224	1219	1219	1219	1220	1220	1213	1211	1209	1212	1212	1213	1215	1216	1220	1224	1227	1234	1238	1242	1253	1259	1264	1273	1288	1291	1298	1307	1316	1338	1350	1362	1377	1397	1434	1440	1438	1440	1462	1469	1475	1482	1488	1503	1507	1508
1230	1232	1231	1228	1225	1223	1225	1225	1224	1222	1213	1211	1209	1212	1217	1218	1220	1220	1223	1229	1234	1241	1247	1259	1266	1271	1276	1287	1299	1305	1316	1327	1338	1356	1367	1382	1395	1439	1450	1456	1459	1461	1480	1486	1492	1500	1504	1503	1507	1508
1234	1233	1230	1228	1225	1227	1225	1225	1224	1222	1217	1214	1212	1214	1220	1223	1225	1226	1229	1237	1242	1249	1256	1270	1276	1283	1288	1296	1311	1322	1335	1347	1355	1368	1383	1399	1415	1454	1463	1471	1478	1485	1497	1486	1492	1500	1504	1516	1518	1518
1233	1233	1230	1228	1225	1227	1227	1225	1225	1222	1220	1216	1215	1216	1224	1229	1229	1230	1235	1241	1248	1255	1263	1279	1287	1291	1297	1306	1323	1332	1344	1357	1377	1384	1402	1418	1429	1458	1463	1471	1478	1485	1497	1507	1512	1521	1528	1529	1530	1530
1233	1230	1228	1227	1228	1229	1229	1227	1226	1223	1222	1221	1221	1223	1228	1232	1234	1237	1243	1250	1257	1265	1273	1292	1301	1310	1311	1319	1338	1348	1359	1371	1389	1403	1402	1418	1429	1458	1468	1480	1492	1502	1519	1527	1534	1539	1545	1541	1540	1542
1229	1229	1228	1230	1232	1232	1230	1229	1228	1225	1226	1226	1226	1230	1234	1237	1241	1243	1254	1260	1268	1275	1285	1303	1317	1326	1331	1345	1355	1348	1359	1371	1389	1403	1425	1443	1448	1475	1488	1507	1517	1543	1545	1549	1557	1563	1560	1557	1554	1553
1229	1229	1231	1233	1232	1233	1231	1229	1228	1228	1229	1231	1231	1235	1239	1244	1248	1251	1262	1269	1276	1284	1294	1315	1335	1326	1331	1345	1355	1368	1375	1388	1404	1418	1441	1456	1471	1520	1530	1541	1552	1573	1572	1574	1579	1579	1576	1573	1568	1563
1230	1231	1233	1233	1232	1234	1233	1231	1230	1232	1234	1236	1236	1243	1246	1252	1259	1261	1273	1280	1276	1284	1304	1315	1335	1340	1346	1357	1367	1377	1386	1403	1419	1438	1452	1467	1520	1538	1553	1570	1586	1596	1597	1596	1595	1591	1585	1584	1581	1575
1233	1235	1234	1235	1233	1234	1235	1234	1233	1236	1239	1240	1241	1248	1255	1260	1259	1267	1273	1280	1290	1300	1317	1328	1339	1348	1354	1366	1378	1393	1406	1417	1440	1454	1465	1481	1530	1558	1579	1607	1626	1630	1625	1618	1614	1605	1596	1594	1590	1585
1237	1238	1237	1236	1235	1235	1235	1234	1236	1239	1243	1240	1241	1248	1255	1260	1267	1280	1285	1292	1303	1314	1330	1339	1350	1358	1364	1378	1388	1406	1426	1443	1456	1467	1485	1498	1524	1553	1583	1609	1645	1650	1643	1633	1624	1611	1608	1603	1590	1585
1238	1240	1240	1238	1236	1235	1234	1234	1236	1239	1243	1245	1249	1254	1262	1268	1274	1290	1295	1303	1314	1322	1341	1349	1360	1369	1376	1396	1406	1417	1432	1453	1466	1478	1495	1512	1534	1559	1573	1588	1624	1649	1648	1641	1624	1611	1608	1603	1599	1598
1240	1241	1240	1238	1236	1235	1234	1237	1240	1243	1246	1248	1255	1262	1271	1277	1282	1299	1306	1314	1325	1334	1350	1358	1370	1380	1399	1412	1420	1428	1442	1469	1484	1498	1516	1528	1564	1588	1594	1588	1639	1649	1648	1641	1632	1621	1617	1612	1608	1609
1240	1241	1242	1241	1239	1237	1237	1242	1243	1245	1248	1250	1265	1271	1278	1284	1292	1310	1316	1324	1335	1353	1358	1365	1377	1387	1408	1417	1429	1439	1448	1484	1502	1518	1538	1528	1564	1588	1594	1610	1621	1640	1647	1646	1641	1632	1625	1618	1615	1621
1241	1243	1244	1243	1241	1241	1242	1245	1246	1247	1250	1254	1271	1278	1285	1292	1300	1321	1327	1334	1345	1364	1369	1372	1382	1393	1423	1423	1431	1443	1448	1484	1502	1518	1538	1577	1605	1613	1641	1651	1645	1652	1654	1655	1651	1640	1635	1626	1623	1641
1241	1244	1246	1245	1243	1244	1247	1249	1251	1252	1255	1262	1279	1286	1293	1301	1322	1334	1342	1351	1361	1377	1382	1385	1391	1401	1423	1423	1431	1443	1477	1500	1519	1535	1551	1606	1626	1641	1659	1670	1669	1667	1668	1666	1659	1648	1643	1637	1633	1645
1243	1246	1247	1245	1247	1248	1250	1255	1257	1257	1262	1269	1290	1296	1303	1312	1332	1343	1354	1368	1380	1377	1382	1385	1391	1401	1433	1437	1447	1458	1493	1517	1538	1554	1576	1625	1648	1678	1684	1692	1686	1683	1682	1678	1666	1662	1657	1650	1647	1651
1244	1248	1248	1249	1249	1253	1255	1259	1260	1263	1269	1288	1297	1303	1312	1322	1343	1343	1354	1368	1380	1394	1399	1403	1414	1428	1443	1458	1469	1475	1511	1543	1556	1577	1604	1668	1703	1722	1717	1710	1700	1698	1693	1689	1680	1678	1671	1664	1661	1673
1248	1250	1251	1252	1255	1257	1260	1264	1267	1271	1276	1294	1304	1303	1312	1322	1343	1354	1363	1383	1391	1403	1410	1417	1427	1445	1456	1469	1479	1493	1537	1567	1582	1610	1637	1687	1704	1716	1718	1714	1710	1704	1701	1698	1691	1686	1680	1675	1673	1688
1248	1250	1254	1255	1257	1260	1266	1270	1267	1271	1276	1294	1304	1312	1324	1338	1359	1370	1384	1398	1408	1414	1425	1433	1437	1459	1470	1479	1489	1503	1545	1569	1594	1617	1663	1673	1682	1694	1699	1718	1717	1710	1706	1706	1701	1686	1680	1675	1673	1688
1249	1250	1255	1257	1257	1260	1266	1270	1272	1278	1284	1299	1308	1320	1334	1350	1373	1388	1400	1409	1419	1428	1437	1443	1454	1469	1483	1494	1502	1516	1549	1570	1590	1605	1641	1652	1665	1683	1697	1719	1719	1710	1706	1706	1701	1697	1691	1687	1693	1697
1249	1253	1255	1257	1260	1263	1270	1274	1277	1283	1291	1305	1313	1324	1340	1365	1378	1397	1407	1416	1429	1440	1447	1454	1462	1479	1497	1507	1514	1543	1560	1582	1598	1612	1638	1655	1665	1683	1697	1719	1719	1712	1711	1711	1710	1709	1703	1699	1709	1716
1252	1254	1256	1259	1262	1266	1274	1279	1283	1288	1297	1311	1319	1329	1344	1372	1384	1401	1412	1421	1439	1448	1459	1466	1475	1500	1507	1520	1535	1558	1568	1584	1598	1612	1638	1655	1675	1696	1706	1726	1724	1721	1720	1721	1724	1724	1717	1712	1728	1737
1253	1256	1259	1262	1265	1270	1277	1283	1288	1294	1309	1317	1325	1335	1349	1375	1390	1402	1413	1424	1445	1456	1469	1479	1505	1517	1526	1520	1535	1558	1568	1584	1600	1614	1644	1664	1691	1712	1731	1736	1734	1729	1730	1735	1735	1736	1734	1734	1749	1757
1255	1257	1260	1265	1267	1271	1280	1285	1291	1298	1313	1320	1329	1339	1352	1379	1393	1403	1414	1428	1452	1463	1478	1479	1505	1517	1526	1538	1554	1574	1579	1593	1609	1618	1652	1670	1700	1720	1743	1743	1739	1736	1738	1743	1739	1740	1743	1755	1779	1786
1254	1259	1261	1264	1268	1277	1283	1289	1293	1301	1316	1323	1334	1344	1356	1383	1394	1405	1414	1441	1452	1463	1478	1489	1517	1526	1539	1550	1566	1591	1602	1619	1627	1651	1662	1676	1717	1737	1748	1745	1742	1743	1745	1745	1742	1742	1748	1780	1797	1818
1255	1258	1262	1264	1268	1278	1284	1290	1295	1303	1317	1326	1337	1347	1356	1383	1394	1405	1418	1447	1458	1473	1486	1499	1529	1541	1556	1570	1582	1611	1626	1647	1654	1668	1684	1693	1719	1747	1750	1745	1745	1746	1746	1748	1747	1750	1750	1794	1823	1871
1253	1258	1262	1263	1267	1281	1284	1289	1297	1303	1317	1326	1337	1347	1372	1382	1394	1405	1420	1451	1466	1483	1496	1509	1539	1554	1568	1586	1618	1633	1641	1655	1663	1683	1700	1713	1727	1738	1751	1749	1750	1750	1747	1751	1753	1756	1759	1794	1823	1871
1254	1258	1262	1264	1269	1281	1284	1289	1297	1304	1320	1329	1339	1350	1375	1383	1392	1406	1420	1453	1468	1485	1501	1514	1548	1562	1577	1594	1627	1641	1648	1659	1669	1696	1722	1737	1745	1747	1756	1755	1754	1755	1747	1751	1753	1756	1759	1803	1843	1897
1254	1258	1262	1264	1269	1281	1285	1291	1297	1312	1321	1332	1344	1354	1379	1386	1397	1410	1422	1456	1470	1486	1504	1535	1554	1568	1586	1604	1630	1644	1654	1665	1676	1706	1733	1749	1758	1761	1756	1755	1754	1755	1754	1758	1763	1763	1767	1803	1847	1899
1254	1256	1262	1266	1274	1280	1285	1292	1300	1316	1325	1335	1347	1355	1381	1393	1403	1414	1428	1456	1470	1488	1506	1538	1556	1571	1589	1611	1633	1643	1659	1671	1684	1706	1733	1749	1758	1761	1765	1769	1760	1757	1768	1774	1777	1775	1780	1798	1830	1875
1254	1255	1262	1264	1273	1279	1286	1293	1301	1319	1327	1339	1349	1358	1384	1395	1409	1420	1447	1460	1473	1488	1506	1539	1555	1570	1591	1610	1632	1643	1659	1671	1695	1711	1733	1748	1768	1764	1770	1773	1769	1767	1778	1785	1787	1785	1788	1796	1831	1876
1253	1257	1263	1263	1271	1277	1286	1295	1303	1320	1330	1341	1350	1374	1388	1398	1412	1424	1449	1465	1477	1491	1508	1541	1555	1570	1591	1610	1632	1647	1662	1676	1700	1715	1736	1756	1777	1772	1771	1775	1776	1778	1792	1795	1796	1798	1809	1815	1835	1867
1254	1255	1260	1264	1268	1275	1284	1292	1299	1319	1329	1340	1352	1378	1391	1400	1416	1428	1454	1469	1477	1491	1508	1541	1559	1573	1591	1622	1635	1655	1668	1679	1702	1723	1748	1760	1779	1778	1776	1780	1787	1803	1809	1811	1810	1815	1838	1840	1851	1873
1255	1256	1258	1262	1268	1273	1282	1290	1306	1316	1326	1340	1354	1380	1393	1400	1416	1428	1454	1469	1481	1496	1513	1547	1563	1576	1595	1627	1647	1664	1676	1689	1722	1734	1748	1762	1780	1781	1780	1786	1798	1823	1825	1833	1835	1839	1870	1870	1880	1893
1257	1262	1265	1265	1271	1276	1279	1286	1305	1314	1324	1340	1354	1380	1393	1405	1419	1431	1458	1473	1486	1502	1536	1550	1567	1581	1599	1635	1653	1669	1682	1702	1741	1745	1753	1763	1786	1784	1786	1789	1796	1833	1840	1847	1854	1862	1895	1894	1880	1893
1260	1268	1271	1271	1275	1280	1279	1286	1305	1314	1324	1339	1353	1384	1397	1407	1420	1447	1462	1478	1490	1508	1542	1556	1575	1588	1605	1639	1655	1670	1684	1721	1766	1766	1762	1771	1800	1804	1795	1799	1805	1832	1846	1847	1854	1862	1895	1894	1903	1906
1266	1269	1271	1271	1275	1280	1284	1288	1308	1318	1328	1342	1357	1385	1399	1410	1424	1453	1469	1484	1497	1514	1541	1557	1574	1589	1605	1635	1653	1665	1688	1786	1792	1775	1773	1783	1815	1831	1826	1799	1805	1832	1846	1860	1871	1893	1911	1922	1927	1925
1266	1269	1271	1276	1279	1282	1288	1294	1307	1319	1329	1343	1371	1385	1401	1413	1427	1456	1473	1489	1503	1516	1543	1557	1574	1588	1605	1636	1654	1663	1683	1774	1772	1765	1773	1783	1815	1831	1826	1815	1812	1831	1846	1862	1879	1915	1936	1939	1934	1926
1267	1266	1271	1280	1283	1285	1289	1297	1312	1321	1332	1345	1369	1384	1402	1415	1428	1456	1471	1488	1503	1517	1547	1562	1578	1596	1629	1643	1657	1666	1683	1774	1772	1765	1768	1778	1809	1826	1837	1832	1825	1834	1846	1861	1877	1932	1945	1944	1938	1923
1266	1271	1278	1283	1284	1286	1292	1309	1318	1327	1336	1348	1370	1385	1400	1414	1428	1456	1470	1487	1501	1536	1551	1568	1587	1596	1629	1643	1657	1666	1677	1731	1738	1752	1759	1769	1798	1813	1834	1843	1845	1846	1855	1867	1881	1931	1941	1943	1934	1911
1266	1267	1275	1284	1284	1286	1294	1313	1323	1334	1341	1348	1371	1385	1400	1414	1429	1457	1475	1490	1502	1536	1551	1568	1587	1602	1632	1644	1657	1667	1676	1709	1730	1741	1752	1769	1788	1805	1821	1844	1870	1875	1878	1884	1887	1912	1928	1930	1924	1889
1268	1265	1280	1285	1286	1290	1298	1316	1324	1334	1342	1355	1377	1390	1401	1415	1444	1457	1475	1490	1502	1539	1553	1571	1590	1603	1632	1642	1654	1666	1683	1698	1714	1730	1746	1764	1780	1797	1809	1838	1877	1882	1882	1880	1879	1893	1908	1910	1914	1895
1273	1270	1281	1290	1291	1296	1304	1320	1330	1340	1346	1360	1377	1390	1401	1415	1444	1457	1472	1491	1504	1536	1551	1569	1586	1601	1630	1638	1649	1664	1678	1689	1702	1721	1740	1758	1768	1779	1793	1815	1857	1860	1858	1858	1864	1871	1881	1884	1896	1895
1277	1275	1285	1292	1297	1301	1308	1320	1330	1340	1346	1372	1383	1397	1409	1423	1450	1464	1477	1493	1506	1536	1549	1564	1582	1613	1626	1636	1648	1663	1677	1686	1697	1714	1736	1750	1758	1765	1779	1797	1828	1835	1835	1834	1843	1871	1881	1884	1896	1904
1282	1281	1287	1292	1297	1301	1308	1325	1332	1343	1350	1372	1383	1399	1414	1427	1456	1469	1484	1499	1512	1540	1554	1566	1580	1609	1624	1635	1647	1661	1677	1688	1696	1710	1729	1749	1754	1764	1775	1805	1828	1835	1835	1834	1843	1846	1850	1856	1872	1891
1282	1281	1287	1293	1300	1305	1320	1328	1338	1347	1351	1376	1388	1402	1419	1430	1457	1470	1484	1499	1527	1542	1555	1570	1587	1614	1628	1637	1646	1657	1678	1683	1690	1705	1738	1744	1754	1764	1775	1805	1819	1821	1820	1822	1828	1828	1828	1834	1848	1871
1284	1285	1292	1296	1301	1306	1322	1330	1340	1351	1360	1383	1393	1406	1425	1437	1459	1471	1485	1498	1526	1542	1558	1575	1598	1627	1634	1644	1652	1658	1676	1683	1690	1705	1738	1744	1749	1759	1771	1802	1815	1819	1824	1821	1810	1806	1804	1810	1840	1847
1286	1292	1297	1302	1306	1310	1327	1335	1344	1354	1365	1389	1398	1408	1426	1450	1463	1476	1488	1502	1533	1552	1567	1585	1611	1641	1644	1644	1652	1667	1676	1680	1686	1701	1729	1736	1741	1747	1761	1793	1810	1825	1839	1834	1788	1781	1782	1786	1817	1822
1290	1294	1299	1307	1313	1317	1333	1340	1350	1362	1372	1395	1403	1414	1428	1456	1469	1483	1497	1510	1548	1566	1567	1585	1611	1641	1644	1647	1656	1670	1675	1680	1688	1701	1723	1728	1732	1738	1759	1802	1823	1839	1839	1794	1770	1763	1763	1763	1786	1795
1297	1301	1306	1311	1318	1324	1341	1349	1359	1369	1391	1401	1410	1417	1429	1461	1475	1488	1497	1510	1548	1566	1581	1604	1650	1651	1651	1655	1660	1671	1678	1688	1695	1705	1720	1723	1728	1735	1804	1832	1843	1844	1827	1769	1751	1745	1743	1743	1753	1762
1303	1309	1312	1318	1324	1331	1349	1357	1367	1377	1397	1407	1414	1417	1429	1461	1475	1488	1504	1524	1565	1581	1598	1631	1662	1665	1666	1664	1667	1679	1685	1695	1704	1712	1724	1727	1731	1738	1810	1825	1830	1825	1807	1754	1739	1732	1728	1727	1736	1739
1310	1319	1322	1325	1331	1350	1357	1366	1376	1377	1397	1407	1414	1422	1434	1463	1479	1493	1509	1554	1573	1591	1613	1650	1672	1675	1674	1671	1675	1686	1693	1701	1710	1727	1733	1736	1740	1745	1812	1815	1811	1802	1786	1746	1732	1727	1728	1727	1736	1739
1320	1325	1330	1334	1331	1350	1357	1366	1376	1386	1407	1413	1419	1427	1439	1466	1481	1494	1513	1558	1577	1597	1614	1657	1686	1688	1689	1685	1688	1695	1701	1708	1717	1736	1741	1744	1748	1756	1804	1799	1788	1802	1786	1746	1732	1727	1723	1721	1726	1726
1320	1325	1330	1334	1338	1361	1371	1378	1385	1394	1414	1424	1431	1436	1456	1470	1484	1499	1517	1558	1576	1596	1609	1660	1697	1702	1702	1700	1701	1707	1712	1717	1724	1739	1742	1746	1754	1756	1804	1799	1788	1776	1742	1725	1721	1721	1719	1717	1716	1716
1327	1331	1337	1343	1347	1371	1381	1387	1395	1411	1419	1431	1441	1448	1462	1473	1487	1500	1517	1559	1578	1595	1613	1657	1702	1706	1709	1708	1711	1716	1722	1725	1724	1739	1742	1746	1754	1766	1786	1779	1767	1755	1728	1718	1715	1715	1715	1712	1711	1707
1335	1342	1347	1354	1359	1382	1391	1398	1405	1421	1431	1438	1449	1457	1478	1490	1498	1505	1520	1562	1588	1605	1617	1690	1705	1712	1716	1718	1711	1716	1722	1725	1728	1739	1745	1750	1756	1772	1773	1767	1752	1743	1727	1717	1713	1710	1710	1706	1703	1697
1343	1350	1357	1365	1379	1391	1402	1410	1417	1430	1440	1451	1457	1463	1485	1501	1514	1522	1537	1569	1595	1608	1619	1690	1705	1712	1716	1718	1725	1728	1734	1736	1735	1751	1757	1762	1763	1762	1761	1756	1748	1741	1733	1721	1713	1709	1707	1700	1695	1688
1350	1358	1365	1372	1386	1397	1408	1417	1425	1439	1448	1460	1465	1467	1484	1502	1518	1529	1560	1569	1595	1608	1619	1670	1687	1701	1711	1719	1731	1737	1741	1741	1756	1773	1774	1769	1757	1752	1751	1749	1744	1739	1726	1719	1714	1710	1707	1702	1692	1684
1355	1364	1370	1379	1393	1403	1414	1422	1429	1451	1461	1468	1474	1480	1484	1502	1518	1529	1560	1573	1594	1608	1619	1646	1655	1670	1689	1697	1724	1732	1736	1734	1747	1763	1762	1741	1724	1727	1726	1731	1731	1730	1722	1717	1713	1711	1707	1704	1698	1688
1359	1368	1375	1383	1400	1411	1419	1430	1438	1458	1461	1468	1474	1480	1490	1506	1519	1533	1565	1575	1594	1616	1625	1647	1650	1657	1669	1703	1717	1726	1722	1712	1716	1717	1714	1708	1697	1694	1693	1697	1703	1714	1718	1714	1712	1712	1702	1704	1698	1688
1363	1372	1378	1388	1404	1411	1419	1430	1449	1458	1470	1479	1482	1492	1503	1518	1533	1548	1569	1585	1613	1650	1661	1670	1671	1670	1677	1704	1724	1724	1711	1703	1688	1678	1676	1671	1664	1665	1665	1669	1674	1692	1701	1714	1712	1712	1702	1696	1695	1692
1370	1372	1378	1388	1404	1416	1425	1434	1452	1462	1475	1486	1492	1499	1510	1528	1546	1555	1579	1604	1644	1665	1682	1684	1685	1684	1695	1716	1723	1715	1704	1697	1681	1671	1664	1651	1643	1643	1665	1669	1674	1692	1701	1703	1702	1699	1690	1680	1673	1670
1370	1378	1384	1403	1410	1421	1432	1440	1458	1467	1479	1491	1498	1510	1516	1534	1551	1574	1591	1613	1651	1673	1688	1690	1691	1698	1711	1722	1716	1708	1698	1683	1669	1666	1664	1651	1643	1643	1644	1648	1657	1672	1684	1689	1686	1683	1672	1666	1653	1644
1375	1385	1391	1408	1416	1426	1437	1445	1463	1471	1483	1493	1500	1519	1524	1538	1561	1589	1602	1617	1644	1664	1692	1695	1700	1710	1722	1722	1715	1708	1698	1675	1669	1666	1657	1644	1628	1626	1626	1631	1641	1660	1665	1666	1665	1658	1652	1648	1635	1629
1379	1389	1395	1413	1420	1430	1441	1451	1466	1475	1487	1498	1513	1528	1535	1548	1570	1605	1617	1627	1647	1667	1695	1703	1712	1710	1722	1722	1715	1708	1696	1662	1654	1650	1645	1636	1623	1619	1620	1622	1628	1640	1644	1642	1639	1632	1629	1623	1611	1605
1381	1392	1400	1419	1427	1437	1449	1457	1469	1479	1493	1503	1523	1535	1545	1561	1577	1613	1630	1646	1647	1667	1695	1703	1712	1722	1731	1724	1717	1710	1702	1660	1644	1636	1632	1633	1622	1617	1619	1622	1618	1618	1622	1619	1613	1606	1602	1596	1584	1581
1386	1397	1405	1425	1435	1445	1456	1469	1477	1486	1497	1509	1532	1543	1554	1568	1577	1613	1630	1646	1664	1697	1710	1723	1735	1745	1744	1732	1722	1713	1700	1659	1645	1630	1622	1622	1618	1611	1611	1617	1614	1609	1609	1605	1595	1584	1578	1571	1564	1563
1391	1404	1412	1432	1440	1451	1462	1476	1485	1490	1503	1509	1532	1543	1554	1568	1582	1617	1638	1659	1680	1716	1733	1756	1783	1785	1758	1747	1736	1727	1706	1665	1649	1635	1622	1605	1601	1595	1594	1599	1606	1601	1594	1588	1581	1571	1566	1556	1564	1562
1398	1412	1428	1440	1447	1459	1469	1476	1485	1490	1503	1516	1535	1549	1560	1570	1601	1621	1643	1664	1690	1739	1747	1776	1801	1799	1769	1756	1746	1740	1694	1669	1648	1635	1625	1602	1596	1587	1581	1580	1593	1593	1583	1568	1581	1571	1566	1556	1547	1544
1406	1419	1428	1440	1447	1459	1469	1486	1493	1501	1511	1524	1537	1549	1563	1572	1610	1630	1660	1683	1698	1743	1756	1767	1780	1789	1771	1763	1753	1741	1692	1668	1651	1634	1624	1606	1600	1589	1578	1580	1593	1593	1583	1568	1566	1563	1559	1546	1532	1531
1406	1419	1438	1448	1454	1467	1478	1491	1501	1510	1517	1534	1542	1554	1565	1579	1621	1654	1681	1693	1698	1745	1757	1765	1770	1767	1756	1748	1745	1732	1683	1664	1650	1633	1622	1606	1600	1589	1578	1568	1557	1560	1556	1542	1542	1546	1545	1534	1521	1515
1412	1423	1445	1455	1462	1472	1482	1493	1505	1513	1520	1539	1549	1560	1575	1592	1629	1655	1681	1694	1705	1767	1775	1776	1777	1765	1744	1728	1718	1707	1683	1664	1650	1633	1622	1610	1605	1594	1582	1558	1547	1540	1531	1522	1520	1517	1516	1511	1505	1501
1418	1431	1452	1465	1473	1479	1494	1503	1510	1516	1521	1539	1552	1568	1582	1599	1631	1654	1678	1698	1771	1781	1784	1783	1781	1754	1744	1728	1718	1707	1676	1663	1648	1631	1613	1607	1603	1592	1581	1562	1552	1545	1535	1523	1506	1503	1501	1497	1494	1494
1429	1447	1458	1472	1480	1485	1493	1504	1513	1516	1521	1539	1549	1565	1580	1600	1644	1671	1697	1731	1774	1781	1784	1783	1781	1754	1733	1713	1699	1691	1668	1657	1646	1631	1613	1606	1601	1594	1589	1570	1563	1561	1550	1536	1517	1506	1500	1493	1485	1484
1438	1454	1464	1476	1484	1487	1493	1500	1511	1514	1519	1541	1549	1564	1582	1630	1662	1671	1697	1731	1774	1779	1783	1781	1777	1746	1729	1710	1697	1679	1671	1662	1650	1636	1617	1610	1608	1602	1597	1578	1568	1560	1552	1541	1533	1518	1506	1499	1485	1483
1446	1466	1477	1487	1491	1494	1501	1503	1509	1514	1523	1545	1549	1564	1582	1630	1662	1702	1728	1758	1775	1779	1783	1781	1779	1754	1731	1714	1705	1689	1680	1670	1658	1646	1625	1616	1609	1603	1600	1578	1571	1565	1556	1543	1537	1529	1515	1499	1483	1481
1452	1474	1487	1497	1501	1503	1508	1512	1509	1514	1535	1545	1560	1578	1589	1644	1699	1740	1758	1764	1776	1780	1783	1783	1776	1769	1755	1737	1724	1702	1685	1673	1657	1643	1623	1614	1607	1602	1594	1585	1577	1572	1562	1550	1541	1529	1515	1499	1483	1481
1458	1483	1493	1497	1501	1506	1508	1512	1512	1517	1542	1555	1569	1584	1598	1648	1698	1729	1743	1763	1785	1787	1786	1781	1777	1773	1769	1760	1748	1706	1679	1663	1646	1633	1615	1609	1602	1593	1585	1583	1579	1572	1562	1550	1541	1534	1526	1512	1482	1474
1458	1483	1493	1502	1508	1515	1514	1515	1517	1524	1550	1563	1578	1589	1605	1656	1683	1709	1726	1770	1779	1784	1786	1780	1775	1772	1769	1763	1746	1692	1670	1655	1634	1612	1605	1601	1602	1593	1585	1583	1579	1575	1570	1558	1548	1539	1531	1519	1493	1480
1480	1487	1497	1505	1513	1525	1521	1522	1529	1538	1561	1575	1589	1600	1614	1666	1683	1710	1737	1764	1772	1782	1782	1779	1772	1764	1757	1751	1732	1676	1657	1639	1634	1612	1605	1601	1596	1589	1583	1579	1575	1573	1569	1557	1546	1534	1530	1507	1494	1486
1491	1495	1501	1508	1514	1528	1530	1534	1542	1550	1570	1585	1597	1612	1645	1667	1687	1719	1748	1783	1783	1783	1779	1774	1768	1761	1748	1751	1707	1676	1657	1639	1620	1599	1595	1592	1591	1587	1580	1574	1572	1570	1562	1557	1547	1537	1531	1504	1493	1482
1497	1500	1505	1511	1516	1531	1535	1543	1548	1554	1567	1583	1599	1613	1652	1682	1701	1737	1762	1789	1784	1777	1771	1774	1768	1761	1748	1732	1689	1663	1646	1629	1615	1596	1591	1588	1585	1584	1574	1571	1569	1566	1553	1547	1541	1533	1528	1506	1492	1480
1503	1509	1513	1519	1524	1533	1536	1540	1543	1555	1565	1577	1594	1612	1675	1703	1720	1746	1762	1789	1784	1777	1771	1764	1763	1757	1749	1732	1691	1662	1638	1626	1616	1598	1591	1587	1581	1572	1571	1569	1565	1561	1543	1536	1531	1522	1517	1500	1492	1481
1508	1514	1521	1527	1532	1534	1536	1540	1541	1555	1568	1584	1602	1614	1675	1703	1720	1746	1769	1781	1770	1763	1756	1749	1746	1737	1728	1711	1671	1653	1630	1620	1613	1597	1588	1582	1574	1561	1563	1559	1553	1546	1529	1522	1516	1509	1505	1488	1481	1471
1513	1517	1521	1525	1531	1536	1539	1539	1543	1555	1568	1584	1602	1614	1686	1704	1714	1726	1763	1757	1749	1742	1735	1725	1720	1714	1706	1687	1654	1642	1629	1620	1604	1599	1589	1581	1574	1557	1553	1546	1538	1533	1517	1511	1505	1497	1496	1488	1481	1471
1518	1520	1522	1524	1535	1536	1539	1539	1543	1562	1580	1602	1613	1636	1669	1690	1704	1715	1745	1741	1733	1726	1719	1703	1698	1690	1680	1666	1640	1631	1621	1615	1602	1597	1589	1582	1573	1556	1551	1543	1535	1530	1517	1511	1505	1497	1480	1471	1465	1457
1518	1520	1522	1524	1535	1538	1541	1543	1547	1579	1591	1608	1617	1649	1665	1687	1699	1714	1732	1725	1714	1708	1702	1684	1679	1671	1662	1640	1631	1624	1616	1608	1594	1589	1583	1576	1570	1556	1551	1543	1535	1522	1513	1506	1497	1487	1463	1458	1450	1443
1521	1524	1528	1533	1541	1544	1547	1552	1591	1597	1603	1613	1620	1659	1683	1696	1706	1721	1721	1711	1700	1696	1690	1677	1668	1660	1651	1631	1625	1618	1612	1604	1593	1589	1583	1576	1570	1551	1547	1539	1534	1518	1509	1502	1495	1484	1454	1445	1438	1429
1530	1534	1538	1543	1549	1552	1557	1563	1594	1594	1601	1615	1624	1674	1708	1716	1720	1725	1709	1701	1693	1686	1674	1668	1660	1650	1641	1627	1625	1618	1612	1604	1593	1587	1579	1571	1552	1544	1538	1532	1525	1512	1506	1501	1490	1475	1450	1439	1429	1414
1543	1548	1552	1560	1566	1568	1573	1581	1591	1596	1612	1622	1638	1702	1716	1725	1729	1713	1705	1695	1687	1678	1667	1661	1660	1650	1641	1627	1621	1615	1608	1602	1590	1582	1574	1563	1545	1536	1531	1523	1515	1499	1495	1489	1476	1462	1439	1431	1421	1411
1560	1563	1572	1585	1585	1588	1592	1595	1606	1617	1630	1639	1658	1720	1731	1735	1730	1714	1704	1695	1687	1678	1667	1661	1653	1642	1635	1621	1616	1612	1605	1592	1583	1575	1566	1556	1536	1525	1516	1510	1500	1485	1473	1466	1455	1434	1425	1419	1410	1402
1585	1592	1600	1608	1608	1610	1613	1615	1626	1637	1648	1662	1711	1732	1738	1735	1730	1714	1704	1696	1688	1680	1663	1654	1644	1635	1627	1615	1611	1607	1600	1588	1580	1568	1557	1549	1526	1512	1502	1493	1481	1470	1457	1446	1433	1417	1411	1402	1393	1384
1618	1620	1629	1638	1640	1639	1640	1642	1652	1661	1648	1662	1711	1732	1738	1738	1732	1714	1706	1700	1694	1686	1660	1653	1643	1632	1614	1608	1605	1602	1595	1582	1572	1563	1550	1530	1511	1496	1487	1479	1464	1452	1438	1431	1419	1402	1391	1383	1393	1384
1642	1646	1651	1658	1663	1664	1640	1646	1652	1661	1675	1694	1731	1742	1744	1735	1727	1709	1702	1695	1689	1669	1660	1651	1643	1632	1611	1602	1596	1590	1584	1568	1558	1548	1535	1514	1483	1474	1465	1459	1451	1437	1422	1431	1419	1402	1391	1383	1377	1368
1655	1646	1651	1658	1663	1664	1663	1685	1700	1707	1716	1723	1745	1744	1736	1724	1714	1695	1688	1679	1674	1664	1657	1646	1634	1626	1604	1594	1586	1577	1564	1547	1537	1522	1507	1478	1466	1453	1443	1459	1451	1437	1422	1414	1405	1383	1373	1365	1357	1344
1655	1658	1667	1673	1689	1696	1689	1717	1728	1728	1733	1737	1742	1736	1724	1712	1694	1684	1677	1671	1667	1656	1648	1637	1624	1613	1594	1584	1578	1569	1543	1526	1510	1499	1507	1478	1466	1453	1443	1439	1425	1410	1404	1401	1385	1368	1360	1352	1345	1330
1663	1669	1692	1704	1714	1724	1724	1754	1750	1749	1746	1741	1726	1719	1707	1695	1679	1670	1662	1654	1654	1647	1640	1629	1615	1605	1588	1577	1572	1567	1543	1526	1510	1499	1486	1466	1454	1442	1432	1421	1402	1393	1391	1385	1364	1355	1347	1339	1333	1320
1674	1683	1705	1716	1726	1737	1747	1757	1751	1740	1732	1717	1708	1699	1689	1678	1663	1651	1645	1640	1639	1632	1625	1620	1609	1599	1588	1577	1572	1567	1543	1526	1500	1484	1473	1452	1441	1429	1419	1409	1390	1383	1374	1364	1352	1343	1336	1329	1323	1307
1684	1694	1715	1726	1738	1746	1751	1745	1739	1724	1717	1704	1692	1682	1674	1664	1646	1636	1631	1629	1628	1632	1625	1620	1609	1595	1584	1574	1566	1557	1537	1516	1492	1476	1462	1439	1428	1416	1406	1389	1379	1366	1357	1350	1337	1332	1326	1319	1313	1298
1692	1702	1727	1735	1741	1742	1739	1733	1729	1720	1711	1694	1679	1669	1660	1650	1646	1636	1631	1629	1625	1619	1614	1607	1600	1586	1576	1567	1559	1546	1521	1501	1483	1472	1440	1429	1417	1406	1397	1374	1365	1356	1351	1344	1329	1324	1318	1310	1303	1292
1704	1712	1716	1720	1724	1726	1726	1721	1714	1708	1704	1680	1679	1669	1660	1650	1629	1623	1617	1614	1610	1606	1600	1595	1590	1576	1568	1559	1551	1542	1514	1486	1469	1461	1429	1419	1406	1396	1389	1367	1355	1348	1341	1337	1324	1317	1310	1303	1292	1292
1706	1703	1700	1706	1709	1711	1713	1721	1714	1708	1704	1680	1666	1654	1644	1626	1613	1604	1600	1598	1596	1591	1585	1581	1578	1566	1555	1547	1540	1518	1496	1473	1459	1446	1418	1409	1395	1388	1382	1366	1356	1344	1337	1333	1324	1317	1310	1303	1292	1288
1696	1677	1676	1706	1709	1711	1713	1705	1693	1683	1683	1664	1654	1645	1632	1611	1600	1590	1585	1583	1580	1575	1569	1562	1557	1546	1537	1530	1523	1497	1480	1463	1449	1438	1409	1399	1390	1386	1381	1362	1356	1344	1337	1327	1316	1309	1306	1298	1284	1281
1696	1677	1676	1678	1677	1673	1673	1668	1664	1654	1645	1640	1636	1630	1618	1598	1592	1579	1570	1567	1560	1555	1551	1545	1533	1523	1515	1507	1504	1494	1484	1472	1447	1431	1407	1399	1390	1386	1372	1362	1354	1345	1336	1320	1310	1303	1298	1290	1282	1280
1676	1649	1647	1649	1649	1640	1639	1635	1632	1627	1618	1620	1613	1610	1602	1589	1579	1564	1557	1554	1551	1547	1544	1538	1523	1512	1502	1496	1493	1490	1487	1472	1447	1431	1407	1398	1391	1384	1367	1356	1347	1339	1329	1313	1305	1296	1291	1283	1279	1275
1640	1630	1624	1623	1624	1622	1620	1616	1612	1608	1595	1592	1583	1579	1572	1564	1558	1549	1545	1543	1542	1541	1537	1532	1517	1507	1502	1496	1493	1490	1487	1475	1445	1413	1403	1395	1391	1380	1363	1359	1350	1338	1324	1308	1298	1289	1286	1281	1272	1269
1613	1611	1609	1607	1604	1604	1603	1600	1596	1591	1575	1565	1558	1553	1545	1542	1539	1535	1533	1532	1534	1533	1537	1532	1517	1507	1498	1491	1485	1485	1481	1471	1450	1410	1396	1390	1384	1374	1362	1356	1347	1336	1325	1309	1298	1290	1283	1281	1274	1272
1600	1599	1595	1593	1590	1587	1581	1577	1571	1567	1557	1549	1546	1541	1530	1531	1529	1535	1533	1532	1534	1533	1527	1521	1509	1503	1494	1484	1474	1473	1470	1460	1441	1404	1391	1385	1376	1370	1355	1347	1340	1332	1317	1305	1300	1295	1289	1279	1273	1269
1596	1595	1591	1588	1583	1565	1559	1555	1550	1542	1541	1539	1539	1541	1530	1531	1529	1529	1528	1526	1525	1523	1521	1518	1511	1503	1488	1480	1467	1463	1457	1450	1439	1403	1393	1383	1370	1363	1347	1340	1334	1329	1316	1308	1298	1290	1288	1274	1270	1266
1589	1590	1587	1585	1580	1552	1543	1538	1550	1542	1541	1539	1539	1537	1523	1524	1526	1526	1524	1524	1523	1523	1522	1516	1509	1503	1489	1477	1465	1460	1453	1444	1429	1396	1384	1376	1364	1349	1340	1333	1330	1325	1314	1305	1298	1293	1288	1274	1270	1266
1582	1585	1582	1577	1563	1552	1543	1538	1533	1526	1524	1524	1524	1522	1514	1515	1520	1521	1520	1522	1522	1522	1520	1511	1505	1501	1490	1476	1465	1461	1455	1447	1430	1391	1376	1366	1354	1337	1330	1324	1318	1325	1314	1305	1298	1293	1287	1275	1272	1266
1582	1585	1582	1577	1555	1544	1535	1530	1523	1514	1511	1511	1509	1506	1501	1502	1509	1514	1516	1515	1512	1512	1512	1504	1499	1497	1488	1474	1463	1457	1451	1446	1423	1391	1372	1361	1351	1337	1330	1324	1318	1316	1308	1301	1295	1290	1278	1275	1272	1266
1579	1578	1578	1577	1557	1543	1535	1524	1515	1505	1502	1502	1499	1495	1495	1495	1500	1504	1505	1503	1500	1498	1500	1496	1491	1489	1485	1473	1456	1449	1445	1439	1423	1391	1372	1361	1351	1331	1325	1322	1318	1312	1301	1296	1291	1286	1274	1273	1268	1264
1578	1576	1571	1569	1555	1545	1536	1525	1518	1507	1504	1497	1495	1494	1493	1493	1497	1500	1497	1489	1484	1484	1483	1480	1478	1475	1473	1453	1456	1449	1445	1439	1413	1388	1367	1357	1350	1330	1323	1321	1315	1302	1298	1292	1287	1284	1274	1270	1266	1261
1579	1580	1575	1568	1547	1542	1534	1525	1515	1511	1509	1501	1497	1494	1493	1493	1495	1496	1493	1486	1477	1474	1471	1480	1478	1475	1473	1453	1447	1441	1436	1429	1398	1379	1362	1355	1346	1332	1324	1315	1309	1296	1293	1286	1283	1277	1273	1269	1265	1260
1581	1575	1569	1562	1544	1539	1534	1531	1523	1523	1522	1516	1507	1499	1496	1494	1495	1492	1486	1486	1477	1474	1466	1465	1464	1462	1459	1449	1440	1434	1428	1420	1388	1368	1358	1350	1336	1329	1319	1309	1306	1295	1292	1287	1284	1280	1273	1269	1264	1259
1598	1587	1578	1563	1558	1554	1547	1540	1531	1526	1524	1522	1514	1499	1496	1494	1495	1489	1486	1480	1472	1467	1463	1458	1453	1448	1445	1441	1433	1426	1419	1409	1376	1362	1354	1342	1330	1322	1312	1306	1303	1296	1294	1289	1286	1282	1272	1267	1264	1259
1611	1602	1590	1571	1564	1561	1553	1546	1530	1523	1524	1522	1514	1499	1497	1498	1501	1495	1491	1483	1476	1473	1462	1455	1449	1441	1428	1416	1412	1406	1398	1372	1361	1352	1341	1333	1322	1317	1313	1308	1305	1294	1294	1289	1283	1275	1268	1267	1264	1259
1612	1608	1599	1577	1566	1561	1553	1546	1530	1523	1521	1515	1495	1489	1488	1489	1489	1485	1481	1480	1482	1480	1469	1463	1459	1454	1441	1402	1391	1384	1379	1360	1351	1342	1334	1329	1316	1310	1307	1304	1303	1292	1294	1289	1283	1275	1268	1265	1262	1258
1614	1608	1599	1577	1566	1558	1551	1544	1533	1525	1520	1512	1495	1485	1479	1480	1479	1477	1476	1475	1475	1473	1468	1463	1458	1450	1425	1410	1395	1382	1372	1353	1346	1338	1331	1325	1312	1307	1307	1304	1297	1292	1289	1285	1280	1267	1263	1262	1259	1257
1614	1612	1608	1585	1574	1564	1555	1540	1533	1527	1523	1516	1495	1485	1475	1472	1472	1473	1473	1474	1472	1464	1463	1459	1449	1442	1426	1413	1402	1391	1382	1362	1353	1338	1331	1325	1312	1307	1304	1299	1290	1287	1284	1280	1275	1266	1262	1261	1259	1258
1617	1614	1613	1593	1583	1574	1563	1545	1534	1525	1522	1516	1494	1484	1472	1469	1466	1469	1474	1475	1471	1459	1457	1453	1446	1439	1425	1413	1401	1391	1382	1362	1353	1344	1335	1321	1313	1309	1303	1297	1287	1282	1280	1278	1270	1263	1261	1259	1258	1255
1620	1618	1610	1600	1588	1579	1567	1547	1538	1529	1523	1514	1488	1481	1472	1468	1463	1467	1470	1469	1464	1455	1453	1448	1446	1439	1425	1413	1401	1392	1376	1367	1360	1350	1340	1327	1317	1311	1304	1299	1289	1283	1278	1272	1266	1262	1261	1259	1258	1249
1622	1620	1614	1606	1593	1581	1571	1551	1540	1532	1526	1513	1485	1475	1471	1464	1460	1462	1463	1460	1464	1455	1453	1448	1443	1434	1423	1411	1399	1391	1374	1366	1360	1352	1343	1328	1318	1311	1307	1302	1293	1287	1280	1273	1261	1260	1259	1257	1254	1246
1623	1619	1612	1604	1590	1580	1570	1555	1543	1532	1524	1498	1487	1474	1468	1464	1460	1462	1463	1460	1456	1451	1448	1444	1441	1426	1417	1408	1398	1391	1376	1370	1363	1353	1342	1329	1322	1316	1310	1305	1292	1284	1279	1274	1263	1259	1256	1255	1249	1245
1624	1619	1609	1597	1586	1578	1567	1556	1545	1534	1523	1498	1487	1474	1468	1463	1453	1454	1453	1450	1448	1446	1444	1441	1437	1424	1416	1407	1399	1393	1380	1372	1364	1355	1348	1333	1322	1317	1311	1297	1290	1283	1280	1274	1266	1259	1255	1253	1249	1245
1625	1617	1599	1590	1582	1572	1562	1556	1545	1534	1523	1497	1490	1477	1465	1459	1450	1450	1449	1446	1441	1441	1441	1440	1435	1421	1415	1407	1399	1394	1381	1372	1366	1358	1342	1333	1323	1318	1310	1296	1288	1282	1278	1272	1266	1259	1255	1253	1251	1244
1621	1595	1599	1590	1582	1572	1557	1556	1550	1535	1519	1494	1486	1477	1466	1456	1446	1445	1446	1445	1439	1439	1436	1434	1431	1420	1415	1408	1401	1397	1384	1376	1367	1358	1339	1329	1322	1315	1307	1296	1288	1282	1278	1272	1265	1260	1256	1253	1249	1250
1621	1595	1586	1580	1573	1566	1552	1547	1536	1523	1514	1491	1485	1478	1468	1451	1446	1446	1445	1444	1441	1440	1439	1437	1430	1421	1417	1415	1410	1396	1386	1377	1366	1355	1337	1329	1322	1315	1307	1293	1288	1282	1277	1270	1260	1256	1254	1254	1258	1259
1601	1582	1575	1567	1562	1557	1542	1534	1523	1511	1503	1489	1482	1473	1463	1450	1446	1444	1443	1442	1439	1440	1442	1441	1435	1421	1417	1415	1412	1396	1386	1377	1366	1355	1337	1327	1317	1313	1305	1290	1285	1280	1276	1264	1260	1252	1252	1258	1262	1262
1579	1564	1558	1549	1545	1541	1525	1518	1507	1496	1481	1474	1469	1464	1457	1443	1439	1438	1438	1439	1437	1435	1435	1434	1428	1421	1417	1415	1412	1396	1386	1373	1361	1352	1333	1325	1315	1308	1293	1286	1282	1277	1273	1261	1257	1250	1254	1261	1263	1264
1558	1543	1537	1531	1526	1513	1507	1500	1490	1484	1471	1466	1461	1458	1451	1440	1436	1435	1434	1436	1431	1435	1435	1434	1428	1421	1415	1413	1411	1393	1380	1366	1355	1345	1327	1318	1309	1301	1288	1283	1277	1274	1270	1258	1253	1249	1254	1260	1264	1265
1546	1533	1525	1514	1508	1497	1492	1485	1481	1475	1465	1461	1457	1452	1447	1438	1435	1435	1434	1435	1431	1428	1428	1427	1423	1416	1411	1409	1405	1381	1367	1355	1344	1327	1318	1308	1300	1294	1281	1277	1271	1269	1266	1253	1254	1252	1255	1259	1264	1266
1522	1514	1506	1491	1484	1478	1478	1474	1471	1467	1456	1452	1457	1452	1447	1438	1435	1432	1429	1427	1426	1425	1424	1423	1418	1412	1404	1397	1389	1368	1357	1346	1336	1317	1310	1300	1291	1285	1273	1269	1267	1265	1263	1253	1253	1254	1256	1263	1266	1266
1500	1492	1487	1478	1472	1463	1463	1461	1471	1467	1456	1452	1450	1445	1437	1437	1435	1432	1428	1422	1421	1420	1420	1417	1405	1399	1390	1382	1363	1354	1344	1335	1326	1307	1299	1289	1280	1274	1266	1261	1261	1260	1254	1253	1254	1254	1256	1263	1266	1269
1492	1485	1477	1478	1472	1463	1463	1461	1461	1449	1446	1444	1440	1437	1434	1433	1431	1428	1426	1421	1419	1416	1411	1406	1393	1383	1375	1367	1348	1341	1333	1322	1313	1293	1285	1275	1265	1263	1262	1257	1261	1260	1254	1253	1254	1257	1261	1268	1271	1275
1492	1485	1477	1468	1463	1455	1453	1452	1451	1442	1434	1431	1430	1431	1428	1426	1424	1423	1422	1416	1413	1409	1404	1386	1379	1371	1362	1354	1334	1329	1320	1310	1298	1282	1271	1264	1265	1260	1262	1257	1256	1256	1254	1256	1260	1263	1267	1273	1278	1283
1486	1475	1467	1462	1456	1453	1451	1449	1444	1434	1429	1426	1423	1422	1418	1417	1417	1416	1413	1407	1404	1399	1393	1376	1366	1356	1348	1342	1323	1317	1310	1310	1298	1282	1271	1264	1259	1258	1258	1256	1257	1257	1258	1261	1265	1268	1270	1277	1284	1291
1477	1473	1469	1469	1462	1458	1453	1450	1446	1437	1434	1430	1426	1424	1417	1415	1412	1408	1400	1399	1394	1387	1381	1366	1358	1346	1337	1342	1323	1317	1310	1298	1282	1270	1262	1260	1260	1261	1258	1256	1257	1256	1258	1263	1267	1271	1275	1280	1290	1297
1482	1479	1477	1475	1469	1465	1460	1454	1448	1435	1432	1430	1428	1421	1417	1413	1409	1405	1394	1390	1383	1376	1381	1366	1358	1346	1337	1330	1312	1304	1296	1287	1275	1264	1261	1262	1264	1264	1259	1257	1257	1258	1256	1262	1269	1274	1282	1288	1294	1303
1478	1478	1480	1480	1474	1469	1463	1458	1451	1437	1431	1425	1425	1419	1414	1409	1404	1400	1394	1390	1383	1376	1372	1357	1350	1339	1330	1313	1305	1295	1287	1280	1273	1266	1262	1261	1262	1264	1261	1258	1257	1259	1261	1264	1270	1276	1289	1294	1301	1310
1463	1471	1473	1477	1474	1469	1464	1459	1445	1440	1432	1422	1419	1419	1414	1409	1404	1400	1388	1382	1375	1368	1361	1347	1339	1330	1319	1304	1297	1290	1282	1277	1271	1269	1266	1266	1266	1261	1260	1260	1259	1265	1269	1271	1276	1282	1299	1305	1309	1319
1455	1454	1464	1469	1469	1465	1461	1458	1444	1440	1432	1422	1419	1413	1408	1402	1397	1392	1383	1377	1370	1363	1345	1335	1328	1319	1311	1298	1291	1286	1279	1275	1272	1270	1269	1269	1263	1262	1260	1262	1264	1276	1281	1284	1289	1297	1299	1305	1309	1319
1453	1444	1448	1458	1469	1465	1461	1458	1444	1438	1431	1424	1417	1410	1406	1400	1392	1382	1376	1371	1363	1355	1335	1326	1321	1315	1308	1294	1289	1284	1279	1279	1276	1274	1274	1272	1263	1264	1264	1266	1270	1286	1281	1284	1289	1297	1313	1321	1326	1332
1453	1444	1448	1458	1458	1455	1453	1450	1438	1433	1427	1422	1418	1406	1399	1391	1383	1371	1364	1358	1354	1345	1330	1322	1316	1308	1303	1292	1289	1290	1289	1284	1281	1278	1275	1274	1273	1264	1264	1266	1270	1286	1290	1296	1301	1320	1327	1335	1343	1349
1452	1441	1439	1447	1446	1443	1441	1438	1427	1424	1417	1411	1399	1391	1386	1379	1372	1361	1355	1348	1341	1333	1320	1316	1311	1303	1298	1296	1297	1296	1295	1288	1283	1278	1275	1274	1273	1273	1276	1278	1282	1296	1303	1312	1319	1340	1347	1356	1365	1370
1448	1444	1436	1432	1430	1429	1428	1426	1417	1412	1405	1401	1389	1383	1376	1371	1364	1350	1345	1339	1332	1321	1316	1312	1309	1301	1299	1302	1297	1296	1295	1288	1283	1280	1280	1279	1282	1284	1288	1291	1304	1310	1321	1331	1339	1372	1384	1384	1385	1384
1444	1441	1436	1421	1418	1414	1411	1407	1405	1401	1396	1390	1379	1371	1365	1357	1352	1339	1332	1328	1325	1312	1309	1309	1309	1301	1299	1302	1301	1299	1297	1291	1288	1287	1288	1287	1290	1294	1298	1303	1318	1326	1335	1345	1352	1392	1403	1405	1401	1396
1442	1439	1435	1423	1419	1412	1406	1396	1392	1387	1385	1380	1369	1363	1354	1346	1339	1333	1324	1328	1325	1312	1309	1309	1306	1302	1305	1305	1304	1303	1301	1296	1296	1295	1295	1299	1302	1307	1313	1319	1334	1343	1353	1365	1373	1393	1409	1418	1417	1411
1442	1437	1426	1422	1417	1412	1404	1391	1381	1374	1375	1371	1362	1356	1347	1346	1338	1333	1324	1320	1319	1310	1308	1306	1304	1307	1309	1310	1309	1309	1307	1305	1306	1305	1306	1311	1315	1322	1329	1335	1356	1366	1378	1388	1394	1403	1413	1423	1429	1424
1437	1432	1423	1417	1412	1407	1400	1385	1377	1369	1375	1371	1362	1356	1347	1341	1334	1327	1317	1313	1312	1307	1307	1306	1308	1312	1314	1314	1314	1313	1310	1312	1312	1313	1315	1322	1326	1335	1343	1350	1375	1385	1397	1402	1414	1418	1424	1423	1429	1424
1432	1426	1417	1412	1407	1401	1400	1385	1377	1369	1363	1359	1355	1349	1341	1335	1328	1319	1315	1312	1309	1306	1308	1311	1314	1320	1319	1317	1319	1320	1316	1318	1321	1322	1325	1335	1341	1350	1360	1371	1396	1403	1409	1402	1414	1418	1424	1430	1435	1432
1432	1426	1417	1412	1407	1401	1387	1379	1370	1365	1360	1347	1344	1339	1334	1326	1319	1314	1312	1311	1310	1310	1313	1317	1320	1324	1323	1322	1324	1325	1324	1326	1331	1333	1336	1349	1355	1365	1360	1386	1396	1403	1409	1414	1426	1431	1435	1440	1443	1442
1432	1423	1412	1405	1400	1392	1381	1375	1366	1361	1356	1346	1340	1334	1330	1325	1317	1313	1311	1312	1317	1319	1320	1323	1325	1327	1326	1326	1327	1329	1332	1334	1338	1342	1336	1349	1355	1365	1377	1405	1414	1416	1417	1422	1435	1441	1446	1452	1457	1456
1429	1411	1403	1399	1394	1386	1375	1367	1359	1353	1348	1342	1338	1334	1329	1322	1316	1318	1321	1324	1324	1323	1323	1326	1328	1329	1330	1332	1333	1329	1332	1334	1338	1342	1353	1360	1367	1377	1389	1417	1425	1426	1426	1432	1443	1450	1455	1461	1466	1469
1424	1405	1400	1395	1389	1381	1368	1360	1350	1344	1341	1337	1331	1328	1325	1320	1323	1324	1331	1332	1329	1325	1325	1331	1335	1329	1330	1332	1333	1337	1339	1344	1348	1353	1367	1375	1381	1393	1405	1425	1432	1434	1436	1439	1451	1459	1465	1470	1483	1488
1416	1402	1397	1393	1387	1377	1361	1355	1343	1338	1331	1328	1328	1329	1329	1329	1331	1332	1337	1338	1329	1325	1325	1331	1335	1333	1336	1338	1340	1348	1349	1354	1360	1367	1380	1388	1395	1407	1420	1434	1437	1440	1443	1451	1459	1467	1473	1481	1497	1506
1410	1401	1396	1389	1382	1374	1355	1350	1340	1333	1327	1329	1335	1335	1332	1336	1331	1332	1337	1338	1332	1331	1334	1341	1344	1345	1347	1349	1350	1357	1358	1364	1370	1377	1391	1398	1406	1418	1429	1441	1443	1444	1448	1459	1467	1474	1481	1491	1510	1522
1411	1402	1395	1386	1379	1361	1354	1346	1340	1332	1329	1329	1335	1335	1332	1336	1338	1340	1345	1348	1348	1350	1353	1357	1362	1365	1368	1370	1371	1367	1371	1377	1381	1389	1403	1410	1418	1428	1443	1448	1449	1451	1456	1468	1476	1484	1491	1501	1522	1522
1416	1402	1393	1383	1376	1359	1351	1346	1340	1332	1329	1329	1335	1336	1337	1341	1344	1349	1355	1361	1364	1366	1367	1369	1375	1377	1380	1382	1386	1384	1385	1390	1397	1408	1416	1423	1429	1437	1452	1454	1456	1459	1465	1479	1476	1484	1491	1501	1522	1536
1405	1397	1393	1383	1376	1359	1351	1343	1337	1334	1332	1333	1335	1339	1344	1345	1349	1356	1362	1369	1373	1374	1375	1376	1382	1385	1387	1390	1393	1396	1399	1403	1409	1419	1427	1433	1438	1444	1458	1461	1456	1459	1465	1479	1485	1493	1501	1522	1531	1547
1405	1397	1386	1379	1371	1355	1349	1343	1338	1336	1337	1339	1340	1344	1351	1353	1356	1363	1370	1379	1381	1382	1383	1384	1389	1391	1394	1400	1406	1408	1414	1420	1426	1433	1439	1433	1438	1444	1458	1461	1464	1467	1473	1486	1493	1501	1510	1528	1538	1554
1401	1391	1382	1371	1364	1347	1344	1342	1343	1339	1342	1344	1346	1349	1357	1362	1365	1371	1377	1388	1391	1394	1395	1396	1399	1404	1408	1412	1420	1425	1431	1420	1426	1433	1439	1444	1450	1455	1466	1469	1473	1476	1488	1494	1503	1512	1521	1535	1546	1562
1398	1384	1372	1362	1357	1346	1344	1346	1347	1345	1348	1350	1352	1356	1363	1368	1373	1379	1385	1396	1402	1403	1406	1407	1412	1418	1408	1412	1420	1425	1431	1438	1441	1445	1450	1457	1463	1468	1474	1477	1481	1485	1497	1503	1511	1521	1529	1539	1552	1567
1390	1382	1372	1366	1353	1348	1348	1352	1353	1352	1356	1359	1361	1364	1373	1379	1386	1392	1399	1413	1418	1421	1406	1407	1412	1418	1422	1424	1432	1437	1444	1449	1451	1452	1458	1466	1472	1478	1482	1484	1487	1491	1502	1509	1517	1525	1532	1544	1554	1569
1387	1379	1373	1367	1353	1350	1352	1357	1359	1360	1364	1368	1370	1372	1382	1389	1396	1392	1405	1413	1418	1421	1424	1425	1429	1431	1433	1435	1441	1446	1451	1456	1459	1460	1465	1475	1479	1489	1492	1494	1496	1499	1507	1512	1521	1529	1536	1550	1557	1567
1391	1381	1373	1365	1356	1354	1355	1360	1362	1368	1372	1374	1377	1376	1382	1389	1396	1404	1425	1431	1433	1435	1436	1439	1440	1443	1447	1448	1455	1458	1460	1463	1471	1474	1476	1479	1484	1496	1498	1503	1506	1510	1514	1519	1527	1537	1553	1562	1567	1574
1395	1388	1377	1368	1363	1361	1360	1367	1362	1368	1372	1374	1377	1384	1389	1399	1405	1414	1435	1439	1443	1444	1445	1451	1454	1456	1458	1467	1474	1480	1475	1474	1480	1482	1482	1483	1487	1498	1502	1505	1510	1520	1525	1530	1539	1550	1553	1562	1567	1574
1412	1401	1393	1385	1363	1361	1360	1367	1370	1374	1380	1384	1385	1394	1400	1408	1416	1427	1444	1449	1455	1460	1465	1472	1476	1480	1485	1500	1503	1495	1489	1487	1489	1488	1488	1489	1491	1501	1503	1506	1515	1520	1525	1530	1539	1550	1567	1575	1580	1581
1412	1401	1393	1385	1369	1368	1373	1383	1381	1381	1386	1391	1395	1404	1412	1420	1428	1438	1454	1464	1471	1476	1487	1497	1502	1505	1507	1516	1518	1515	1507	1505	1501	1497	1496	1496	1498	1501	1503	1506	1515	1530	1536	1542	1552	1564	1580	1587	1589	1586
1427	1420	1414	1395	1387	1382	1386	1393	1389	1391	1394	1398	1402	1414	1423	1432	1438	1456	1464	1473	1480	1487	1509	1514	1516	1518	1520	1527	1528	1527	1526	1521	1501	1497	1496	1496	1504	1506	1506	1510	1520	1538	1546	1552	1562	1575	1589	1592	1591	1587
1440	1433	1429	1418	1408	1401	1403	1404	1399	1401	1403	1406	1411	1423	1434	1443	1448	1464	1474	1485	1494	1504	1522	1524	1527	1529	1531	1527	1528	1527	1526	1514	1510	1506	1508	1504	1508	1509	1511	1512	1523	1546	1553	1560	1570	1586	1592	1593	1592	1591
1461	1456	1447	1427	1423	1419	1417	1414	1406	1407	1413	1414	1423	1430	1439	1447	1452	1470	1482	1494	1504	1516	1530	1524	1527	1529	1531	1539	1541	1541	1536	1528	1523	1518	1515	1513	1513	1512	1513	1513	1528	1553	1562	1568	1575	1589	1594	1598	1599	1599
1475	1468	1462	1439	1432	1429	1425	1421	1412	1411	1416	1421	1427	1433	1438	1444	1451	1474	1482	1494	1504	1516	1530	1531	1534	1537	1541	1546	1547	1547	1546	1540	1534	1529	1526	1522	1517	1517	1517	1518	1545	1556	1567	1575	1582	1595	1603	1609	1612	1611
1482	1474	1468	1450	1440	1433	1430	1424	1424	1419	1421	1426	1432	1437	1438	1444	1451	1474	1485	1499	1511	1531	1535	1537	1540	1542	1548	1551	1553	1553	1553	1548	1541	1537	1535	1531	1522	1522	1521	1523	1549	1558	1568	1576	1584	1600	1610	1619	1620	1619
1486	1479	1463	1453	1444	1437	1432	1430	1430	1419	1421	1426	1432	1437	1442	1446	1454	1477	1488	1503	1517	1536	1540	1539	1542	1550	1561	1564	1565	1565	1561	1556	1550	1546	1544	1536	1530	1528	1527	1527	1552	1561	1568	1573	1582	1606	1617	1619	1620	1614
1486	1482	1465	1452	1444	1437	1432	1430	1430	1426	1427	1432	1435	1440	1445	1450	1468	1481	1493	1507	1523	1542	1545	1550	1554	1562	1572	1577	1579	1576	1575	1569	1562	1558	1555	1545	1539	1536	1534	1536	1554	1564	1568	1573	1582	1606	1617	1625	1629	1618
1489	1482	1465	1452	1444	1439	1435	1434	1433	1430	1432	1436	1439	1443	1447	1454	1473	1485	1496	1512	1528	1547	1553	1561	1569	1573	1587	1594	1597	1599	1604	1588	1579	1573	1569	1559	1552	1546	1534	1536	1554	1564	1572	1575	1600	1612	1623	1636	1641	1627
1489	1484	1464	1455	1447	1442	1441	1439	1435	1433	1435	1441	1445	1451	1458	1464	1486	1495	1506	1520	1537	1555	1564	1574	1582	1598	1611	1622	1630	1644	1656	1642	1616	1573	1569	1559	1552	1546	1542	1544	1560	1571	1578	1581	1610	1621	1633	1650	1651	1633
1492	1487	1465	1458	1451	1448	1444	1442	1438	1439	1442	1445	1449	1458	1469	1483	1496	1505	1515	1529	1545	1564	1575	1585	1600	1619	1628	1638	1650	1644	1656	1642	1616	1601	1590	1577	1566	1558	1554	1561	1571	1581	1587	1599	1640	1644	1652	1665	1667	1642
1494	1486	1467	1459	1452	1451	1448	1444	1443	1444	1449	1451	1457	1467	1480	1494	1504	1513	1523	1536	1559	1570	1584	1597	1600	1619	1628	1638	1650	1663	1676	1678	1662	1636	1617	1593	1583	1574	1571	1576	1583	1594	1601	1614	1651	1656	1669	1685	1685	1654
1494	1477	1466	1461	1457	1456	1451	1450	1451	1456	1464	1471	1481	1489	1497	1502	1509	1519	1529	1540	1559	1570	1584	1597	1611	1631	1638	1646	1656	1668	1682	1687	1687	1671	1628	1613	1598	1590	1587	1591	1598	1606	1617	1627	1656	1663	1675	1689	1691	1675
1501	1479	1470	1466	1463	1461	1455	1458	1459	1468	1479	1496	1501	1503	1505	1503	1509	1519	1529	1540	1564	1579	1595	1608	1622	1639	1648	1656	1664	1679	1685	1690	1695	1696	1642	1622	1607	1599	1597	1602	1611	1621	1631	1642	1664	1671	1679	1689	1707	1701
1505	1483	1474	1470	1467	1464	1463	1464	1468	1478	1496	1496	1501	1503	1505	1508	1514	1523	1531	1544	1572	1587	1609	1623	1634	1649	1658	1666	1672	1678	1678	1680	1686	1693	1643	1624	1615	1614	1616	1620	1628	1635	1644	1668	1672	1673	1673	1677	1707	1701
1506	1491	1480	1474	1472	1468	1463	1464	1468	1478	1496	1503	1505	1505	1504	1511	1517	1524	1534	1548	1576	1594	1618	1629	1648	1655	1663	1667	1667	1666	1664	1661	1661	1666	1645	1637	1635	1645	1646	1642	1644	1648	1654	1658	1672	1673	1673	1677	1680	1674
1510	1493	1480	1474	1472	1469	1474	1477	1484	1491	1499	1502	1503	1503	1502	1513	1521	1529	1539	1555	1581	1595	1613	1627	1648	1654	1660	1657	1651	1644	1641	1638	1636	1635	1639	1637	1640	1648	1644	1642	1644	1648	1654	1658	1654	1651	1651	1650	1644	1645
1510	1493	1486	1479	1478	1479	1483	1492	1499	1502	1501	1500	1501	1502	1502	1515	1524	1534	1542	1572	1581	1591	1602	1611	1627	1634	1637	1632	1623	1610	1611	1609	1608	1612	1613	1637	1640	1648	1644	1644	1642	1644	1646	1633	1625	1623	1623	1621	1618	1617
1504	1495	1486	1486	1485	1486	1492	1497	1502	1505	1505	1503	1504	1505	1511	1517	1525	1534	1543	1571	1578	1584	1589	1591	1595	1596	1597	1594	1592	1586	1611	1609	1608	1612	1613	1616	1619	1622	1622	1626	1628	1629	1628	1610	1604	1601	1601	1597	1595	1595
1505	1496	1490	1490	1492	1495	1497	1501	1505	1506	1505	1504	1505	1505	1511	1515	1522	1532	1541	1562	1568	1573	1574	1571	1565	1564	1597	1594	1590	1586	1585	1584	1587	1593	1594	1599	1599	1601	1603	1607	1613	1614	1605	1595	1588	1585	1583	1581	1576	1576
1506	1499	1496	1497	1496	1495	1496	1499	1500	1500	1499	1500	1500	1501	1505	1512	1521	1527	1533	1542	1543	1573	1574	1571	1565	1564	1565	1567	1568	1567	1567	1569	1571	1572	1572	1571	1571	1574	1582	1587	1591	1592	1573	1573	1569	1566	1564	1561	1557	1555
1508	1502	1498	1497	1495	1497	1496	1496	1496	1495	1496	1497	1497	1497	1501	1504	1513	1527	1533	1542	1543	1545	1546	1550	1551	1553	1556	1558	1557	1553	1549	1547	1546	1548	1546	1547	1551	1556	1563	1567	1569	1566	1553	1550	1551	1549	1544	1543	1543	1539
1512	1507	1503	1499	1497	1497	1496	1494	1495	1494	1495	1495	1497	1497	1501	1504	1513	1520	1523	1526	1528	1532	1536	1542	1546	1548	1548	1550	1547	1545	1541	1538	1535	1529	1525	1527	1531	1537	1543	1550	1554	1545	1531	1535	1539	1534	1526	1523	1519	1539
1521	1515	1510	1506	1498	1496	1495	1495	1495	1494	1495	1495	1495	1494	1498	1500	1505	1509	1515	1519	1522	1524	1527	1532	1534	1532	1530	1530	1533	1532	1529	1526	1515	1507	1504	1503	1507	1508	1513	1517	1517	1508	1506	1511	1516	1534	1526	1523	1519	1515
1526	1518	1511	1506	1498	1496	1495	1495	1496	1496	1494	1494	1495	1494	1495	1498	1498	1498	1500	1505	1507	1508	1514	1514	1507	1500	1497	1502	1516	1519	1518	1517	1501	1490	1483	1481	1484	1482	1484	1483	1517	1508	1506	1511	1516	1516	1497	1494	1489	1495
1526	1518	1511	1506	1497	1494	1494	1494	1497	1499	1499	1496	1494	1492	1492	1491	1489	1485	1483	1486	1484	1482	1488	1487	1481	1480	1474	1484	1487	1490	1494	1495	1484	1479	1473	1465	1484	1482	1484	1483	1481	1482	1484	1486	1490	1491	1474	1471	1466	1478
1525	1516	1509	1505	1497	1494	1494	1495	1502	1503	1503	1498	1494	1486	1481	1476	1471	1463	1458	1459	1456	1458	1462	1459	1456	1456	1455	1451	1450	1451	1454	1495	1484	1479	1473	1465	1460	1463	1465	1464	1464	1464	1461	1462	1465	1464	1453	1450	1452	1460
1518	1510	1502	1498	1494	1492	1493	1497	1501	1502	1501	1497	1494	1479	1468	1459	1453	1447	1444	1441	1440	1441	1441	1437	1437	1437	1436	1451	1450	1451	1454	1452	1457	1462	1457	1450	1446	1445	1445	1443	1445	1440	1439	1440	1440	1440	1431	1429	1431	1439
1510	1500	1494	1491	1489	1488	1492	1496	1498	1497	1494	1493	1491	1473	1462	1452	1449	1441	1439	1438	1432	1431	1441	1437	1437	1437	1436	1433	1433	1433	1433	1431	1436	1438	1439	1437	1427	1424	1425	1420	1420	1417	1416	1412	1413	1415	1410	1410	1412	1416
1495	1490	1486	1482	1484	1486	1489	1492	1492	1489	1488	1486	1478	1463	1453	1446	1442	1437	1439	1438	1432	1431	1427	1428	1429	1431	1432	1428	1427	1426	1424	1421	1421	1421	1419	1417	1409	1406	1403	1401	1400	1394	1394	1393	1392	1393	1392	1392	1393	1396
1488	1481	1478	1479	1481	1482	1484	1486	1485	1482	1478	1471	1459	1463	1453	1446	1442	1437	1431	1429	1427	1426	1424	1429	1433	1435	1437	1430	1428	1429	1430	1422	1417	1414	1410	1405	1401	1398	1393	1391	1388	1378	1377	1375	1374	1374	1372	1373	1376	1376
1478	1475	1474	1476	1478	1480	1481	1482	1482	1482	1478	1471	1459	1454	1450	1446	1440	1430	1429	1427	1426	1426	1424	1428	1429	1430	1432	1431	1430	1430	1430	1424	1420	1417	1410	1403	1393	1389	1378	1374	1366	1362	1362	1360	1357	1353	1372	1373	1376	1376
1475	1472	1472	1474	1478	1480	1481	1482	1482	1479	1475	1468	1456	1449	1445	1440	1438	1431	1428	1427	1427	1426	1428	1430	1431	1432	1433	1434	1437	1437	1438	1431	1430	1427	1418	1408	1392	1386	1377	1369	1351	1347	1362	1360	1357	1353	1352	1354	1357	1356
1475	1472	1472	1474	1476	1479	1481	1481	1478	1476	1473	1468	1464	1459	1449	1441	1434	1430	1428	1429	1428	1430	1434	1434	1435	1436	1436	1440	1442	1443	1442	1436	1434	1423	1411	1396	1391	1386	1377	1369	1351	1347	1348	1347	1342	1341	1341	1341	1343	1344
1475	1471	1471	1473	1477	1481	1484	1485	1486	1487	1486	1483	1483	1480	1468	1456	1437	1429	1427	1428	1427	1429	1433	1434	1432	1430	1431	1433	1434	1436	1437	1436	1432	1423	1411	1396	1391	1385	1380	1369	1347	1339	1336	1336	1329	1327	1326	1327	1328	1329
1474	1471	1474	1479	1482	1485	1488	1491	1494	1497	1497	1493	1484	1480	1475	1463	1433	1425	1421	1422	1422	1422	1424	1424	1422	1419	1420	1423	1434	1436	1437	1436	1432	1415	1399	1381	1375	1368	1360	1351	1339	1332	1325	1322	1313	1312	1312	1314	1315	1316
1473	1472	1476	1481	1486	1490	1494	1495	1498	1501	1501	1485	1472	1467	1462	1455	1426	1415	1415	1413	1411	1411	1413	1413	1422	1419	1420	1423	1428	1431	1426	1419	1411	1398	1383	1364	1358	1355	1346	1342	1330	1321	1313	1308	1303	1300	1302	1303	1305	1306
1473	1468	1468	1472	1479	1487	1492	1493	1494	1496	1491	1472	1456	1450	1445	1440	1413	1407	1406	1413	1411	1411	1413	1413	1410	1407	1404	1405	1411	1410	1404	1398	1393	1380	1368	1355	1351	1348	1339	1323	1316	1311	1304	1297	1295	1293	1292	1293	1294	1296
1465	1461	1462	1466	1471	1477	1483	1485	1484	1479	1472	1454	1444	1434	1429	1440	1413	1407	1406	1405	1396	1397	1399	1399	1401	1394	1387	1385	1383	1384	1378	1373	1370	1365	1360	1350	1347	1341	1332	1312	1305	1302	1297	1291	1289	1288	1288	1287	1288	1288
1461	1456	1456	1459	1463	1465	1466	1466	1466	1459	1472	1454	1444	1434	1429	1421	1403	1399	1395	1393	1387	1387	1389	1390	1390	1378	1369	1367	1366	1366	1360	1358	1356	1352	1345	1342	1337	1332	1325	1306	1302	1296	1293	1289	1287	1287	1287	1287	1288	1288
1460	1454	1453	1453	1453	1454	1466	1466	1466	1459	1453	1436	1427	1417	1408	1397	1391	1387	1383	1382	1383	1384	1384	1385	1379	1363	1352	1347	1347	1342	1340	1338	1336	1333	1333	1327	1316	1311	1307	1300	1297	1292	1290	1289	1287	1287	1287	1287	1284	1283
1457	1454	1453	1453	1453	1454	1454	1454	1451	1446	1432	1425	1413	1402	1395	1385	1381	1377	1374	1371	1374	1373	1371	1370	1369	1352	1338	1331	1326	1323	1323	1323	1321	1316	1308	1303	1298	1298	1307	1300	1297	1292	1290	1285	1286	1286	1286	1284	1274	1272
1457	1451	1452	1451	1449	1447	1447	1445	1442	1437	1419	1406	1397	1391	1385	1374	1371	1368	1362	1357	1355	1351	1349	1349	1347	1340	1327	1318	1313	1310	1308	1306	1306	1301	1308	1303	1298	1298	1297	1292	1290	1289	1286	1280	1282	1284	1279	1274	1264	1263
1452	1443	1447	1444	1441	1433	1436	1431	1426	1423	1403	1392	1383	1377	1371	1362	1358	1355	1350	1348	1338	1336	1331	1324	1317	1312	1308	1304	1297	1310	1308	1306	1306	1301	1299	1297	1294	1292	1291	1289	1284	1285	1281	1269	1272	1271	1267	1265	1262	1258
1452	1446	1440	1436	1431	1423	1416	1409	1397	1394	1384	1379	1375	1371	1364	1351	1349	1345	1334	1322	1318	1318	1314	1308	1301	1312	1308	1304	1297	1295	1294	1292	1291	1288	1288	1289	1287	1284	1279	1276	1273	1272	1270	1266	1266	1264	1263	1262	1265	1259
1462	1459	1458	1457	1452	1438	1426	1415	1407	1391	1370	1365	1361	1357	1343	1338	1333	1329	1322	1313	1318	1318	1314	1308	1301	1297	1295	1291	1288	1283	1282	1281	1280	1281	1279	1275	1274	1273	1270	1270	1269	1269	1269	1266	1267	1267	1267	1263	1262	1259
1479	1479	1480	1480	1477	1460	1444	1433	1423	1411	1389	1377	1368	1358	1343	1335	1333	1329	1322	1313	1308	1305	1302	1296	1290	1287	1284	1283	1278	1275	1275	1275	1273	1272	1270	1271	1270	1270	1270	1271	1269	1270	1270	1266	1266	1266	1266	1264	1262	1260
1502	1507	1508	1506	1503	1486	1465	1447	1431	1407	1394	1377	1368	1358	1343	1335	1328	1324	1320	1311	1306	1302	1298	1293	1287	1284	1282	1280	1277	1276	1275	1274	1273	1273	1274	1273	1272	1270	1271	1272	1271	1271	1271	1270	1271	1271	1270	1270	1270	1260
1524	1526	1527	1527	1528	1510	1487	1447	1431	1407	1394	1381	1371	1361	1347	1338	1329	1325	1319	1307	1303	1299	1297	1288	1286	1283	1281	1279	1277	1277	1278	1278	1278	1278	1278	1277	1275	1276	1278	1279	1281	1282	1284	1283	1271	1271	1270	1270	1270	1268
1541	1540	1527	1527	1523	1510	1487	1465	1443	1412	1399	1386	1378	1367	1352	1344	1331	1324	1317	1306	1301	1298	1296	1291	1289	1285	1281	1281	1281	1282	1283	1282	1283	1284	1283	1281	1283	1285	1288	1289	1281	1282	1284	1283	1283	1283	1282	1280	1280	1278
1541	1540	1544	1547	1547	1538	1516	1496	1469	1426	1412	1401	1395	1379	1352	1345	1335	1328	1315	1307	1302	1299	1297	1295	1293	1293	1290	1288	1290	1290	1293	1293	1293	1293	1292	1281	1283	1285	1288	1289	1291	1294	1296	1295	1294	1294	1294	1294	1292	1291
1553	1553	1554	1559	1564	1559	1546	1529	1508	1449	1428	1418	1406	1369	1359	1350	1341	1334	1317	1311	1305	1305	1306	1302	1300	1301	1300	1299	1297	1299	1301	1293	1293	1293	1292	1292	1293	1296	1299	1303	1306	1309	1314	1316	1318	1320	1328	1329	1321	1309
1563	1564	1563	1565	1567	1564	1558	1547	1527	1466	1440	1424	1409	1376	1369	1360	1350	1341	1327	1323	1318	1317	1316	1312	1309	1308	1300	1298	1297	1299	1301	1303	1305	1304	1304	1305	1307	1313	1315	1318	1321	1329	1335	1339	1342	1346	1360	1361	1353	1339
1571	1568	1565	1564	1563	1561	1557	1551	1486	1464	1445	1430	1419	1401	1396	1388	1382	1370	1347	1339	1332	1329	1316	1312	1309	1308	1306	1304	1304	1307	1310	1311	1313	1314	1314	1315	1317	1324	1330	1333	1336	1346	1351	1357	1359	1363	1373	1374	1365	1358
1579	1572	1567	1563	1560	1557	1553	1534	1480	1467	1461	1459	1452	1439	1437	1431	1413	1370	1347	1339	1332	1329	1326	1321	1317	1320	1319	1316	1317	1319	1320	1323	1325	1328	1329	1330	1337	1343	1347	1350	1357	1368	1372	1377	1381	1386	1391	1391	1386	1376
1591	1584	1577	1564	1559	1551	1539	1518	1500	1492	1487	1480	1473	1439	1437	1431	1413	1374	1365	1357	1350	1344	1340	1334	1330	1332	1330	1328	1331	1334	1335	1337	1338	1342	1344	1347	1357	1358	1364	1369	1376	1385	1394	1400	1405	1410	1413	1409	1410	1404
1612	1598	1590	1573	1561	1548	1536	1530	1500	1492	1487	1480	1473	1460	1456	1450	1439	1390	1380	1372	1363	1357	1350	1346	1344	1344	1339	1342	1344	1343	1342	1347	1346	1353	1359	1363	1374	1379	1381	1387	1397	1409	1414	1422	1430	1410	1413	1409	1410	1404
1662	1625	1610	1583	1561	1548	1536	1530	1525	1515	1509	1501	1488	1481	1476	1468	1456	1427	1409	1395	1381	1374	1367	1364	1363	1358	1356	1356	1355	1354	1354	1363	1367	1370	1377	1383	1392	1398	1403	1413	1424	1409	1414	1422	1430	1447	1456	1460	1459	1452
1662	1625	1610	1583	1569	1558	1549	1545	1539	1534	1530	1525	1524	1512	1503	1488	1477	1449	1433	1422	1409	1397	1389	1384	1379	1376	1374	1374	1375	1377	1377	1381	1387	1389	1393	1404	1392	1398	1403	1413	1433	1441	1454	1466	1470	1495	1500	1502	1499	1495
1664	1636	1620	1593	1579	1567	1559	1556	1558	1558	1556	1554	1564	1554	1539	1520	1516	1484	1461	1447	1433	1411	1406	1403	1398	1394	1389	1391	1401	1405	1406	1412	1387	1389	1393	1404	1411	1416	1424	1436	1465	1478	1490	1496	1501	1514	1519	1524	1520	1513
1678	1666	1637	1629	1619	1602	1583	1577	1579	1585	1585	1585	1589	1587	1580	1563	1548	1525	1510	1501	1491	1464	1446	1440	1439	1434	1428	1391	1401	1405	1406	1412	1414	1405	1408	1425	1431	1438	1447	1458	1496	1506	1513	1518	1528	1536	1535	1538	1538	1529
1709	1712	1691	1674	1660	1652	1621	1614	1620	1628	1626	1621	1613	1611	1608	1597	1556	1544	1541	1540	1538	1521	1508	1440	1439	1434	1428	1430	1434	1430	1435	1448	1449	1435	1436	1453	1460	1468	1483	1495	1526	1536	1544	1548	1554	1561	1557	1559	1561	1556
1726	1732	1723	1717	1707	1695	1681	1666	1664	1664	1661	1654	1629	1622	1618	1607	1572	1565	1541	1540	1538	1521	1508	1495	1480	1467	1468	1465	1466	1466	1471	1476	1483	1490	1489	1485	1485	1491	1501	1517	1552	1564	1576	1584	1584	1586	1581	1581	1585	1596
1745	1749	1754	1758	1750	1735	1722	1704	1697	1691	1691	1667	1648	1635	1618	1607	1572	1565	1563	1559	1557	1539	1529	1520	1514	1501	1493	1488	1488	1489	1499	1509	1512	1515	1513	1516	1511	1514	1520	1532	1570	1587	1603	1615	1620	1615	1615	1615	1614	1631
1749	1755	1765	1775	1782	1776	1748	1736	1728	1691	1691	1667	1648	1635	1624	1608	1587	1582	1578	1575	1572	1557	1552	1549	1543	1534	1525	1514	1509	1511	1518	1528	1531	1531	1529	1540	1543	1545	1556	1573	1587	1602	1617	1635	1645	1644	1650	1615	1614	1631
1745	1751	1769	1780	1789	1776	1748	1736	1728	1727	1728	1700	1678	1654	1638	1622	1605	1602	1600	1596	1587	1584	1580	1572	1566	1554	1548	1538	1536	1535	1535	1543	1548	1548	1547	1558	1564	1574	1580	1592	1604	1612	1617	1635	1645	1644	1650	1651	1650	1656
1745	1757	1769	1780	1789	1795	1782	1765	1760	1772	1764	1731	1700	1677	1661	1642	1624	1621	1618	1615	1607	1605	1604	1596	1587	1575	1568	1559	1555	1554	1555	1558	1560	1564	1574	1580	1583	1593	1580	1592	1604	1612	1630	1647	1665	1673	1687	1690	1710	1700
1739	1756	1769	1782	1791	1801	1804	1805	1808	1805	1797	1769	1727	1708	1693	1663	1654	1654	1653	1641	1636	1636	1632	1630	1622	1594	1588	1582	1577	1574	1580	1584	1593	1564	1574	1580	1583	1593	1602	1609	1618	1623	1640	1655	1681	1702	1717	1726	1730	1721
1745	1761	1772	1779	1787	1796	1815	1829	1836	1847	1808	1776	1739	1724	1715	1703	1693	1694	1690	1685	1686	1690	1679	1664	1646	1624	1614	1607	1601	1574	1580	1584	1593	1600	1610	1610	1608	1613	1622	1633	1639	1646	1659	1691	1697	1712	1725	1742	1735	1723
1748	1757	1766	1777	1783	1790	1806	1831	1840	1862	1805	1769	1752	1741	1734	1723	1728	1725	1715	1711	1720	1722	1718	1710	1634	1624	1614	1607	1601	1604	1613	1622	1626	1628	1634	1637	1635	1638	1642	1664	1676	1679	1682	1704	1714	1723	1735	1747	1732	1710
1743	1747	1755	1763	1769	1793	1803	1822	1847	1869	1804	1776	1764	1756	1751	1743	1744	1740	1731	1725	1720	1722	1718	1710	1690	1675	1657	1651	1645	1637	1636	1643	1644	1642	1645	1647	1650	1657	1665	1677	1691	1698	1702	1712	1718	1726	1736	1745	1728	1708
1745	1764	1769	1777	1779	1792	1799	1812	1847	1864	1813	1790	1778	1765	1759	1743	1744	1740	1731	1723	1728	1732	1735	1737	1731	1719	1700	1691	1681	1668	1663	1663	1664	1662	1661	1664	1664	1665	1681	1690	1697	1703	1709	1717	1720	1726	1733	1740	1718	1700
1768	1774	1780	1782	1782	1796	1803	1817	1842	1859	1831	1790	1778	1765	1752	1748	1746	1744	1740	1728	1727	1730	1738	1745	1743	1738	1731	1725	1719	1693	1691	1689	1685	1687	1686	1688	1683	1679	1691	1698	1704	1708	1711	1720	1723	1729	1735	1737	1718	1700
1773	1777	1784	1788	1788	1799	1803	1817	1842	1859	1831	1806	1792	1772	1752	1749	1747	1744	1741	1734	1732	1734	1741	1746	1743	1739	1740	1740	1726	1716	1715	1712	1711	1709	1704	1699	1696	1694	1701	1708	1717	1720	1724	1720	1723	1729	1735	1737	1723	1700
1786	1791	1784	1788	1788	1799	1806	1815	1832	1855	1838	1818	1800	1781	1753	1745	1741	1737	1735	1734	1734	1734	1734	1733	1734	1726	1724	1726	1722	1704	1704	1706	1709	1723	1723	1722	1726	1728	1725	1708	1717	1720	1727	1729	1733	1738	1746	1743	1730	1713
1786	1791	1800	1809	1811	1812	1815	1820	1832	1845	1830	1819	1807	1796	1762	1751	1745	1741	1738	1733	1732	1727	1715	1707	1705	1702	1699	1700	1682	1670	1672	1676	1678	1686	1723	1722	1726	1728	1725	1725	1729	1735	1741	1740	1741	1745	1753	1760	1744	1725
1802	1802	1807	1814	1820	1826	1832	1840	1853	1848	1839	1825	1815	1803	1778	1771	1767	1761	1757	1731	1724	1713	1698	1687	1680	1677	1671	1664	1651	1644	1672	1676	1678	1686	1704	1714	1716	1722	1717	1704	1708	1716	1724	1727	1733	1739	1746	1766	1761	1745
1807	1807	1807	1810	1818	1829	1840	1853	1868	1856	1851	1841	1826	1809	1786	1785	1785	1783	1748	1722	1703	1694	1681	1665	1659	1677	1671	1664	1651	1644	1645	1644	1653	1654	1659	1682	1696	1704	1693	1685	1688	1696	1703	1709	1722	1729	1731	1750	1748	1745
1806	1807	1807	1809	1819	1832	1844	1856	1868	1862	1853	1846	1830	1788	1762	1757	1757	1753	1721	1704	1688	1694	1681	1665	1659	1650	1641	1632	1624	1621	1619	1617	1619	1621	1625	1635	1647	1657	1657	1657	1668	1671	1685	1693	1704	1708	1721	1727	1721	1719
1810	1810	1810	1811	1823	1837	1846	1855	1860	1844	1839	1829	1812	1782	1758	1731	1757	1753	1721	1704	1688	1678	1665	1642	1635	1627	1621	1605	1600	1594	1593	1592	1591	1593	1596	1602	1606	1615	1618	1626	1634	1647	1665	1673	1680	1686	1693	1696	1698	1695
1817	1819	1819	1820	1834	1844	1851	1848	1816	1808	1802	1797	1812	1782	1758	1731	1724	1721	1699	1689	1677	1668	1653	1628	1617	1609	1600	1587	1583	1578	1573	1572	1569	1571	1575	1576	1582	1590	1597	1603	1611	1635	1642	1648	1661	1664	1673	1675	1677	1695
1832	1832	1833	1835	1842	1847	1843	1848	1816	1808	1802	1797	1787	1756	1732	1710	1694	1685	1668	1667	1663	1658	1626	1616	1604	1590	1581	1565	1561	1557	1550	1550	1546	1548	1551	1556	1560	1566	1570	1577	1589	1608	1616	1623	1631	1664	1673	1675	1677	1677
1851	1847	1842	1837	1842	1847	1843	1811	1776	1766	1761	1761	1767	1743	1716	1694	1679	1653	1648	1646	1641	1638	1613	1601	1588	1574	1563	1544	1539	1533	1525	1525	1525	1524	1527	1532	1542	1550	1555	1562	1589	1608	1616	1623	1631	1641	1655	1653	1656	1651
1851	1847	1842	1842	1841	1833	1817	1784	1748	1735	1730	1734	1739	1728	1705	1682	1665	1639	1631	1625	1620	1614	1599	1590	1579	1565	1555	1534	1527	1517	1509	1510	1508	1507	1510	1512	1542	1550	1555	1562	1572	1586	1594	1603	1612	1622	1629	1628	1626	1627
1855	1837	1819	1828	1824	1804	1786	1762	1722	1709	1703	1701	1704	1689	1667	1653	1642	1621	1611	1606	1600	1593	1572	1571	1568	1558	1549	1526	1516	1507	1499	1510	1508	1507	1510	1512	1529	1534	1539	1546	1555	1570	1581	1589	1594	1605	1603	1600	1603	1604
1814	1792	1780	1790	1783	1762	1750	1730	1702	1685	1672	1663	1664	1660	1644	1631	1622	1600	1588	1581	1568	1557	1548	1546	1542	1539	1525	1526	1516	1507	1499	1495	1491	1491	1491	1497	1513	1518	1521	1527	1546	1554	1561	1560	1566	1573	1569	1569	1573	1583
1779	1757	1743	1741	1736	1730	1726	1701	1691	1672	1655	1642	1626	1623	1618	1611	1603	1580	1570	1558	1547	1534	1548	1546	1542	1539	1525	1513	1503	1497	1486	1474	1471	1470	1475	1481	1496	1500	1504	1511	1527	1532	1536	1534	1535	1546	1548	1550	1555	1565
1749	1729	1705	1700	1701	1698	1696	1665	1664	1662	1642	1620	1602	1594	1587	1583	1579	1561	1570	1558	1547	1534	1532	1531	1531	1527	1512	1503	1494	1485	1476	1468	1462	1460	1463	1471	1475	1482	1487	1494	1505	1510	1512	1514	1518	1525	1529	1532	1536	1543
1721	1709	1683	1673	1666	1658	1655	1633	1630	1619	1602	1591	1583	1594	1587	1583	1572	1561	1551	1540	1529	1513	1508	1507	1506	1499	1493	1488	1480	1469	1466	1459	1455	1452	1452	1458	1459	1464	1467	1473	1485	1491	1491	1493	1497	1504	1509	1515	1515	1524
1711	1698	1668	1659	1648	1638	1634	1613	1603	1619	1602	1591	1583	1576	1568	1562	1548	1540	1532	1523	1515	1498	1496	1491	1482	1476	1466	1466	1464	1458	1453	1451	1448	1445	1443	1445	1448	1451	1454	1457	1466	1469	1473	1475	1484	1486	1509	1515	1515	1524
1710	1695	1658	1646	1648	1638	1634	1613	1603	1591	1580	1572	1566	1561	1552	1545	1531	1524	1516	1508	1500	1489	1486	1481	1474	1462	1458	1455	1452	1448	1443	1443	1441	1439	1437	1437	1440	1442	1443	1444	1449	1469	1473	1475	1484	1486	1491	1493	1496	1507
1710	1695	1658	1646	1632	1620	1600	1584	1576	1564	1555	1548	1547	1540	1535	1528	1514	1501	1492	1490	1484	1475	1472	1467	1462	1452	1452	1448	1445	1442	1438	1436	1435	1433	1431	1430	1432	1442	1443	1445	1449	1449	1452	1457	1469	1472	1475	1476	1481	1492
1712	1697	1651	1633	1620	1606	1584	1571	1561	1545	1535	1525	1523	1514	1512	1510	1496	1485	1478	1474	1468	1462	1456	1449	1448	1441	1439	1440	1440	1439	1434	1432	1435	1433	1431	1430	1432	1432	1433	1434	1434	1434	1436	1438	1451	1455	1455	1462	1468	1477
1705	1680	1648	1624	1607	1593	1572	1561	1551	1539	1530	1512	1508	1504	1500	1497	1484	1475	1470	1461	1450	1444	1440	1437	1434	1432	1431	1430	1440	1439	1434	1432	1430	1428	1425	1423	1422	1423	1424	1427	1425	1425	1426	1429	1435	1436	1439	1445	1456	1463
1697	1654	1628	1607	1590	1578	1558	1545	1537	1529	1520	1509	1502	1496	1492	1480	1474	1469	1463	1461	1448	1440	1433	1437	1434	1432	1431	1430	1430	1429	1426	1425	1424	1424	1420	1416	1413	1416	1418	1421	1420	1422	1422	1424	1426	1427	1430	1432	1440	1447
1677	1644	1610	1589	1575	1562	1544	1531	1524	1517	1505	1500	1495	1494	1491	1480	1474	1469	1466	1461	1448	1440	1433	1430	1428	1428	1426	1424	1425	1427	1426	1422	1417	1417	1417	1414	1411	1412	1414	1415	1415	1415	1417	1419	1419	1421	1423	1426	1429	1432
1660	1632	1598	1579	1565	1553	1535	1525	1517	1511	1500	1495	1492	1490	1491	1480	1474	1469	1466	1463	1454	1448	1437	1428	1422	1422	1424	1422	1421	1416	1416	1414	1409	1408	1411	1411	1410	1410	1408	1408	1409	1408	1408	1408	1411	1414	1415	1417	1423	1427
1648	1610	1592	1580	1564	1542	1531	1521	1514	1508	1500	1495	1492	1490	1489	1481	1475	1468	1465	1462	1450	1445	1439	1434	1421	1419	1417	1417	1417	1412	1413	1410	1406	1405	1406	1406	1406	1406	1405	1406	1403	1400	1398	1401	1403	1405	1406	1417	1423	1427
1651	1610	1590	1578	1564	1542	1531	1521	1514	1508	1496	1493	1488	1485	1483	1476	1472	1470	1468	1458	1446	1439	1434	1432	1418	1416	1413	1412	1411	1411	1408	1406	1405	1403	1398	1401	1402	1404	1401	1398	1398	1395	1392	1401	1403	1405	1406	1407	1413	1418
1641	1610	1590	1578	1564	1543	1531	1521	1514	1507	1493	1489	1485	1482	1479	1477	1474	1473	1471	1456	1443	1434	1429	1428	1417	1416	1411	1408	1407	1405	1401	1398	1395	1395	1395	1395	1398	1399	1401	1398	1398	1395	1392	1394	1398	1397	1397	1401	1404	1405
1641	1618	1593	1582	1570	1548	1538	1528	1521	1514	1498	1494	1489	1485	1478	1476	1475	1473	1472	1452	1440	1429	1425	1423	1412	1412	1411	1404	1398	1393	1391	1390	1388	1391	1395	1395	1398	1399	1400	1396	1394	1392	1390	1390	1392	1392	1393	1397	1396	1395
1643	1625	1607	1596	1586	1565	1559	1551	1543	1529	1518	1508	1501	1493	1479	1476	1472	1469	1466	1440	1431	1424	1418	1414	1409	1408	1405	1403	1399	1393	1391	1390	1388	1391	1391	1391	1393	1393	1397	1396	1392	1390	1387	1388	1390	1392	1394	1396	1395	1386
1653	1633	1622	1609	1597	1583	1581	1573	1564	1549	1538	1528	1517	1508	1485	1478	1469	1461	1452	1435	1430	1424	1417	1412	1411	1408	1405	1403	1399	1396	1396	1395	1393	1386	1384	1385	1384	1384	1388	1389	1387	1386	1385	1389	1391	1391	1391	1378	1376	1369
1662	1643	1628	1619	1600	1594	1585	1576	1569	1557	1549	1539	1529	1519	1492	1482	1472	1465	1459	1436	1430	1424	1417	1412	1411	1411	1408	1401	1398	1397	1397	1396	1395	1387	1383	1380	1380	1378	1377	1376	1373	1370	1365	1368	1363	1363	1364	1357	1354	1352
1664	1652	1641	1633	1610	1601	1595	1589	1583	1569	1560	1549	1539	1533	1501	1490	1472	1465	1446	1436	1430	1423	1420	1413	1409	1408	1407	1403	1400	1399	1398	1394	1392	1389	1385	1383	1383	1378	1373	1367	1361	1357	1353	1353	1351	1350	1353	1345	1342	1338
1681	1681	1676	1669	1640	1625	1618	1608	1598	1580	1570	1549	1539	1519	1501	1490	1480	1470	1456	1441	1433	1423	1419	1410	1406	1404	1401	1402	1400	1398	1398	1396	1392	1390	1386	1384	1380	1376	1364	1354	1347	1342	1343	1340	1335	1334	1336	1331	1342	1338
1696	1696	1690	1682	1658	1648	1635	1608	1598	1580	1570	1560	1551	1532	1517	1502	1492	1480	1464	1455	1447	1440	1428	1413	1408	1402	1398	1397	1398	1396	1395	1394	1393	1392	1388	1384	1378	1358	1346	1336	1332	1325	1325	1318	1335	1334	1336	1331	1327	1324
1712	1709	1690	1682	1658	1648	1635	1624	1606	1595	1586	1573	1564	1540	1523	1512	1501	1489	1475	1465	1458	1452	1446	1434	1426	1417	1402	1394	1390	1388	1386	1385	1384	1382	1377	1372	1363	1343	1333	1336	1332	1324	1325	1318	1312	1315	1322	1320	1317	1314
1712	1709	1704	1696	1675	1674	1671	1658	1648	1640	1621	1599	1584	1554	1541	1532	1523	1512	1491	1479	1468	1458	1448	1441	1433	1428	1418	1398	1392	1384	1379	1372	1367	1363	1356	1372	1352	1343	1333	1323	1318	1305	1303	1299	1298	1303	1312	1312	1308	1306
1725	1719	1708	1693	1689	1687	1682	1676	1676	1673	1663	1649	1628	1602	1593	1580	1568	1556	1538	1514	1492	1474	1450	1443	1436	1427	1416	1400	1398	1396	1379	1372	1367	1363	1356	1354	1338	1330	1319	1306	1299	1285	1285	1282	1288	1293	1301	1301	1303	1301
1738	1729	1716	1701	1698	1696	1693	1692	1691	1687	1678	1665	1651	1634	1622	1609	1594	1578	1565	1549	1527	1492	1464	1447	1438	1428	1416	1400	1398	1396	1392	1367	1361	1354	1348	1344	1329	1323	1310	1298	1287	1271	1273	1274	1277	1282	1289	1289	1291	1293
1751	1744	1734	1721	1716	1718	1718	1714	1708	1699	1691	1679	1658	1649	1639	1630	1619	1595	1583	1574	1554	1492	1464	1447	1438	1428	1418	1401	1399	1398	1397	1370	1362	1351	1341	1335	1317	1307	1299	1292	1286	1263	1261	1266	1270	1277	1282	1283	1285	1286
1770	1765	1756	1753	1751	1749	1742	1731	1718	1709	1700	1691	1675	1679	1683	1678	1667	1595	1583	1574	1554	1512	1478	1461	1444	1434	1418	1408	1402	1398	1396	1369	1359	1345	1335	1327	1300	1290	1285	1281	1270	1260	1254	1259	1262	1266	1266	1267	1267	1264
1790	1783	1777	1763	1757	1751	1743	1719	1711	1702	1695	1686	1675	1679	1683	1678	1667	1637	1622	1603	1577	1495	1486	1472	1451	1438	1421	1409	1402	1395	1390	1360	1347	1340	1330	1315	1291	1281	1270	1268	1262	1250	1245	1250	1249	1251	1253	1251	1249	1245
1803	1788	1769	1761	1751	1745	1735	1710	1711	1702	1695	1686	1682	1689	1691	1685	1673	1647	1631	1615	1592	1500	1487	1469	1449	1438	1418	1407	1399	1387	1375	1350	1342	1335	1323	1292	1280	1271	1261	1256	1249	1242	1237	1236	1239	1251	1253	1251	1249	1245
1793	1785	1767	1761	1751	1745	1735	1710	1698	1689	1681	1666	1653	1649	1644	1638	1618	1609	1604	1600	1589	1502	1479	1460	1446	1435	1409	1399	1387	1373	1364	1345	1333	1323	1307	1284	1276	1268	1257	1250	1241	1242	1237	1236	1239	1241	1240	1238	1236	1230
1793	1785	1767	1755	1744	1737	1727	1705	1695	1681	1671	1660	1639	1626	1617	1610	1592	1585	1578	1573	1560	1504	1482	1455	1438	1428	1407	1395	1380	1369	1352	1339	1326	1308	1299	1279	1276	1268	1257	1250	1241	1236	1229	1223	1226	1231	1230	1229	1227	1220
1777	1770	1758	1749	1737	1728	1721	1697	1688	1670	1657	1635	1626	1615	1606	1594	1566	1556	1540	1526	1506	1499	1485	1458	1437	1414	1403	1393	1380	1365	1343	1330	1326	1308	1299	1279	1270	1265	1256	1246	1235	1231	1227	1219	1220	1223	1222	1218	1217	1210
1774	1767	1752	1742	1729	1719	1697	1687	1676	1661	1648	1619	1611	1602	1590	1579	1545	1519	1495	1485	1479	1496	1487	1461	1434	1404	1387	1393	1380	1365	1343	1330	1319	1304	1294	1278	1271	1265	1257	1243	1236	1228	1225	1218	1213	1216	1216	1213	1211	1204
1776	1766	1750	1745	1731	1720	1693	1685	1669	1655	1642	1609	1600	1590	1578	1565	1521	1498	1478	1464	1463	1475	1462	1461	1434	1404	1387	1373	1365	1354	1333	1321	1315	1301	1291	1278	1271	1264	1257	1239	1232	1228	1225	1220	1204	1202	1204	1202	1202	1198
1780	1756	1746	1735	1718	1707	1681	1670	1657	1643	1630	1594	1582	1568	1550	1532	1495	1486	1478	1464	1463	1475	1462	1441	1420	1386	1371	1360	1352	1341	1320	1309	1303	1294	1279	1271	1260	1250	1242	1227	1220	1218	1217	1210	1193	1192	1195	1193	1192	1196
1779	1758	1745	1724	1709	1697	1664	1656	1645	1631	1620	1579	1562	1538	1550	1507	1495	1486	1461	1447	1430	1426	1430	1423	1405	1373	1361	1352	1340	1331	1310	1300	1292	1284	1269	1260	1248	1239	1231	1213	1208	1205	1202	1193	1185	1183	1186	1185	1186	1188
1777	1759	1746	1726	1711	1696	1653	1645	1633	1631	1599	1579	1562	1538	1514	1479	1470	1461	1442	1429	1407	1397	1398	1398	1384	1359	1344	1334	1324	1307	1299	1288	1281	1271	1255	1248	1235	1227	1218	1205	1202	1195	1190	1178	1176	1173	1174	1185	1186	1188
1773	1750	1741	1730	1717	1696	1653	1645	1633	1621	1591	1567	1533	1505	1485	1456	1445	1434	1420	1408	1387	1379	1378	1378	1357	1347	1337	1330	1320	1297	1286	1274	1266	1257	1242	1231	1226	1219	1211	1201	1195	1190	1190	1178	1176	1173	1174	1173	1173	1174
1773	1750	1741	1730	1717	1672	1646	1632	1617	1606	1566	1532	1501	1483	1467	1442	1430	1418	1405	1394	1378	1369	1367	1362	1350	1344	1334	1325	1316	1293	1282	1271	1258	1244	1226	1220	1214	1219	1206	1201	1195	1190	1184	1174	1169	1166	1166	1165	1161	1163
1765	1743	1731	1719	1699	1653	1625	1611	1590	1567	1520	1498	1482	1468	1457	1440	1426	1409	1391	1376	1370	1362	1356	1350	1343	1339	1333	1321	1310	1289	1276	1262	1250	1244	1226	1220	1214	1208	1202	1196	1192	1186	1184	1176	1171	1165	1159	1160	1156	1155
1741	1721	1700	1671	1648	1618	1596	1583	1561	1543	1498	1480	1466	1456	1442	1427	1410	1395	1383	1372	1364	1358	1354	1349	1340	1332	1319	1309	1310	1289	1276	1262	1250	1223	1217	1214	1208	1206	1198	1194	1188	1184	1182	1172	1169	1165	1162	1154	1150	1149
1704	1682	1662	1645	1632	1602	1587	1577	1559	1538	1487	1470	1457	1444	1427	1407	1394	1386	1377	1365	1359	1354	1352	1348	1340	1332	1319	1309	1295	1281	1268	1254	1244	1222	1216	1212	1208	1206	1200	1195	1189	1181	1178	1170	1167	1164	1162	1151	1149	1149
1685	1674	1662	1646	1633	1599	1584	1573	1549	1494	1475	1459	1447	1437	1414	1397	1390	1384	1375	1365	1359	1354	1352	1348	1335	1323	1313	1306	1281	1270	1260	1246	1239	1222	1219	1214	1208	1208	1201	1195	1190	1183	1172	1168	1166	1165	1159	1153	1148	1149
1683	1665	1652	1638	1628	1603	1584	1559	1523	1486	1469	1451	1440	1428	1401	1397	1390	1384	1375	1360	1356	1353	1349	1336	1324	1316	1309	1304	1271	1261	1249	1239	1233	1223	1217	1211	1210	1210	1204	1194	1184	1182	1173	1167	1164	1160	1160	1159	1157	1155
1682	1663	1647	1637	1616	1600	1575	1536	1504	1480	1469	1451	1440	1428	1401	1392	1387	1380	1371	1359	1355	1352	1348	1323	1315	1309	1303	1296	1268	1261	1249	1238	1232	1223	1218	1212	1212	1207	1205	1200	1191	1186	1173	1171	1174	1179	1180	1176	1157	1155
1688	1664	1642	1625	1594	1565	1575	1536	1504	1480	1461	1444	1428	1413	1393	1387	1381	1374	1364	1357	1352	1346	1336	1313	1308	1303	1298	1292	1268	1261	1251	1240	1228	1222	1217	1215	1212	1209	1205	1197	1191	1184	1183	1171	1174	1179	1180	1176	1173	1170
1689	1664	1642	1625	1594	1565	1526	1504	1492	1459	1440	1423	1409	1386	1380	1378	1374	1369	1356	1350	1341	1325	1316	1306	1300	1293	1288	1281	1258	1251	1242	1231	1217	1214	1212	1211	1211	1203	1198	1197	1191	1184	1183	1189	1192	1192	1189	1187	1183	1178
1689	1664	1636	1610	1534	1512	1499	1483	1463	1429	1417	1405	1396	1377	1372	1370	1366	1359	1347	1335	1319	1312	1307	1295	1286	1276	1269	1251	1243	1237	1230	1223	1217	1215	1212	1211	1211	1203	1198	1197	1199	1201	1205	1207	1208	1208	1206	1204	1195	1183
1673	1654	1629	1582	1506	1494	1476	1458	1430	1419	1406	1396	1387	1371	1367	1361	1354	1349	1329	1316	1308	1300	1293	1279	1271	1266	1265	1252	1238	1232	1230	1223	1217	1215	1215	1214	1214	1214	1217	1219	1221	1221	1224	1228	1230	1228	1225	1218	1206	1194
1602	1603	1588	1527	1487	1469	1457	1445	1420	1409	1398	1389	1383	1366	1361	1354	1346	1338	1314	1307	1301	1291	1274	1268	1272	1266	1265	1252	1238	1232	1228	1226	1221	1223	1225	1226	1230	1231	1232	1234	1236	1240	1249	1254	1255	1250	1242	1233	1220	1209
1570	1552	1523	1478	1465	1452	1442	1433	1410	1403	1396	1387	1380	1363	1358	1352	1345	1320	1309	1301	1291	1291	1274	1268	1272	1277	1275	1266	1246	1236	1235	1236	1235	1237	1240	1244	1250	1255	1255	1254	1255	1261	1264	1267	1269	1267	1263	1254	1242	1231
1540	1513	1492	1466	1454	1444	1436	1429	1411	1404	1396	1387	1381	1362	1357	1349	1345	1320	1309	1301	1291	1278	1265	1264	1265	1273	1285	1277	1255	1246	1247	1253	1254	1256	1258	1261	1265	1267	1269	1272	1275	1280	1282	1284	1285	1285	1282	1280	1272	1266
1508	1488	1478	1456	1448	1440	1431	1423	1410	1407	1404	1399	1371	1362	1357	1349	1341	1322	1310	1297	1286	1277	1268	1265	1263	1272	1288	1282	1268	1265	1264	1267	1269	1269	1271	1273	1276	1279	1283	1289	1294	1302	1304	1303	1303	1296	1294	1288	1286	1266
1500	1488	1475	1456	1453	1447	1439	1423	1410	1407	1404	1399	1381	1371	1363	1356	1344	1320	1309	1300	1295	1286	1275	1273	1271	1280	1289	1290	1298	1299	1289	1286	1287	1289	1290	1291	1299	1305	1309	1314	1324	1337	1338	1336	1329	1296	1294	1288	1286	1286
1496	1485	1476	1456	1453	1447	1439	1421	1419	1419	1413	1406	1393	1384	1376	1362	1348	1321	1312	1312	1325	1289	1284	1281	1284	1301	1303	1311	1316	1314	1307	1311	1312	1317	1321	1325	1331	1335	1343	1350	1331	1337	1338	1336	1329	1313	1305	1299	1301	1302
1496	1485	1468	1464	1465	1466	1466	1447	1439	1430	1421	1413	1400	1388	1377	1361	1348	1329	1323	1337	1341	1307	1297	1295	1303	1317	1322	1327	1333	1331	1330	1344	1343	1343	1347	1356	1331	1335	1343	1350	1353	1353	1353	1353	1347	1323	1318	1318	1317	1316
1492	1483	1481	1497	1513	1520	1517	1500	1477	1456	1439	1425	1404	1391	1381	1371	1355	1345	1344	1353	1353	1343	1330	1321	1324	1330	1339	1345	1352	1353	1354	1344	1343	1343	1347	1356	1356	1360	1364	1368	1366	1366	1364	1363	1358	1342	1337	1335	1331	1335
1496	1487	1497	1528	1550	1549	1542	1524	1513	1493	1468	1447	1415	1406	1394	1385	1371	1363	1359	1362	1361	1354	1349	1341	1341	1345	1339	1345	1352	1353	1363	1368	1371	1372	1376	1378	1380	1385	1387	1389	1393	1392	1386	1385	1381	1369	1366	1362	1356	1356
1504	1497	1520	1555	1562	1557	1551	1531	1521	1509	1489	1454	1435	1424	1415	1403	1387	1377	1373	1373	1372	1363	1349	1341	1341	1345	1354	1358	1365	1371	1395	1394	1398	1398	1401	1398	1396	1401	1403	1409	1427	1428	1421	1405	1395	1390	1387	1387	1388	1382
1522	1524	1559	1577	1574	1568	1553	1546	1537	1526	1505	1492	1486	1472	1459	1444	1420	1377	1373	1373	1372	1363	1361	1360	1362	1372	1375	1373	1383	1403	1426	1418	1413	1411	1412	1413	1415	1418	1421	1442	1452	1453	1450	1440	1408	1403	1405	1414	1414	1423
1546	1556	1595	1598	1597	1592	1573	1561	1553	1546	1535	1518	1511	1472	1459	1444	1420	1412	1404	1400	1391	1387	1384	1384	1386	1402	1409	1401	1416	1445	1449	1442	1438	1437	1438	1438	1435	1441	1454	1470	1473	1471	1465	1465	1439	1431	1432	1438	1445	1445
1565	1601	1611	1614	1610	1605	1584	1574	1553	1546	1535	1518	1511	1502	1486	1472	1453	1448	1445	1439	1426	1421	1414	1410	1411	1428	1440	1443	1455	1471	1479	1472	1467	1467	1467	1465	1472	1479	1485	1500	1497	1496	1488	1482	1463	1460	1432	1438	1445	1445
1589	1620	1627	1631	1610	1605	1584	1574	1566	1560	1551	1546	1537	1523	1504	1477	1472	1469	1465	1459	1442	1436	1433	1431	1436	1457	1468	1476	1480	1484	1494	1493	1489	1484	1480	1485	1498	1507	1510	1512	1513	1496	1488	1482	1463	1460	1457	1459	1463	1464
1589	1620	1627	1631	1636	1626	1607	1606	1593	1581	1567	1569	1559	1546	1528	1493	1489	1485	1484	1481	1468	1462	1461	1464	1466	1482	1492	1499	1500	1502	1501	1500	1498	1496	1499	1510	1513	1507	1510	1512	1513	1512	1511	1497	1489	1487	1489	1489	1486	1484
1621	1643	1649	1653	1660	1659	1631	1631	1622	1606	1591	1581	1570	1561	1550	1521	1518	1517	1515	1512	1506	1499	1496	1494	1501	1510	1515	1513	1516	1516	1516	1515	1498	1496	1499	1510	1513	1517	1517	1515	1520	1521	1521	1516	1515	1514	1514	1515	1512	1510
1639	1654	1658	1660	1665	1663	1654	1645	1636	1625	1609	1601	1588	1577	1568	1550	1548	1547	1548	1552	1565	1550	1523	1519	1525	1530	1531	1527	1516	1516	1516	1515	1516	1515	1521	1523	1524	1526	1524	1522	1529	1528	1526	1523	1523	1521	1519	1519	1519	1518
1665	1665	1667	1666	1670	1674	1669	1663	1654	1643	1627	1621	1616	1609	1597	1579	1576	1578	1587	1601	1599	1586	1560	1519	1525	1530	1531	1527	1526	1526	1526	1528	1529	1528	1539	1546	1547	1546	1546	1544	1545	1543	1540	1540	1535	1528	1525	1523	1520	1518
1686	1685	1685	1680	1674	1675	1673	1668	1660	1654	1644	1639	1643	1637	1632	1626	1624	1623	1625	1601	1599	1586	1560	1546	1538	1537	1534	1529	1528	1530	1532	1536	1540	1557	1565	1570	1571	1572	1576	1572	1566	1565	1563	1562	1560	1556	1552	1549	1532	1528
1700	1702	1700	1692	1684	1678	1676	1670	1663	1658	1656	1656	1664	1666	1629	1626	1624	1623	1625	1626	1617	1603	1578	1560	1542	1536	1532	1531	1531	1533	1538	1545	1557	1587	1589	1588	1587	1590	1590	1587	1584	1585	1586	1586	1583	1582	1577	1567	1561	1557
1716	1717	1713	1702	1695	1687	1684	1678	1673	1669	1656	1656	1664	1666	1658	1664	1667	1654	1649	1660	1656	1635	1605	1582	1551	1542	1539	1536	1537	1540	1555	1567	1581	1603	1609	1609	1609	1613	1603	1602	1601	1600	1600	1600	1599	1596	1594	1567	1561	1557
1730	1724	1718	1710	1705	1687	1684	1678	1673	1669	1671	1672	1684	1695	1698	1705	1703	1682	1678	1701	1704	1690	1658	1610	1583	1562	1552	1548	1549	1556	1575	1591	1607	1615	1618	1622	1633	1649	1639	1626	1622	1622	1621	1600	1599	1596	1594	1581	1574	1571
1738	1724	1718	1710	1703	1700	1697	1691	1686	1680	1679	1683	1703	1721	1749	1740	1732	1734	1751	1748	1731	1727	1707	1649	1618	1598	1580	1572	1572	1576	1592	1612	1637	1628	1628	1647	1703	1725	1639	1626	1622	1622	1621	1619	1616	1608	1606	1595	1587	1583
1738	1734	1727	1720	1715	1714	1714	1709	1698	1689	1688	1691	1711	1736	1799	1803	1797	1797	1809	1823	1794	1751	1731	1666	1633	1616	1608	1602	1602	1599	1613	1638	1664	1653	1628	1647	1703	1725	1704	1670	1653	1644	1636	1634	1630	1628	1625	1617	1611	1609
1745	1741	1738	1733	1729	1730	1734	1730	1717	1698	1696	1699	1709	1779	1818	1820	1819	1813	1845	1857	1858	1799	1749	1697	1656	1637	1630	1630	1650	1599	1613	1638	1664	1653	1659	1703	1737	1745	1732	1712	1703	1689	1651	1648	1641	1636	1632	1631	1631	1631
1757	1753	1748	1745	1745	1747	1743	1733	1724	1708	1705	1708	1718	1793	1819	1826	1829	1831	1850	1856	1856	1836	1768	1737	1707	1637	1630	1638	1650	1653	1667	1690	1701	1704	1722	1726	1719	1727	1727	1724	1722	1715	1695	1685	1672	1663	1652	1652	1653	1654
1768	1764	1761	1755	1756	1758	1754	1743	1723	1715	1713	1718	1734	1797	1813	1820	1823	1827	1836	1836	1856	1836	1768	1737	1707	1680	1671	1699	1714	1712	1711	1717	1723	1726	1728	1720	1713	1724	1730	1731	1728	1717	1714	1706	1691	1672	1667	1666	1663	1665
1778	1772	1771	1773	1784	1788	1780	1762	1735	1728	1729	1741	1765	1788	1796	1803	1823	1827	1836	1836	1839	1838	1765	1756	1737	1717	1701	1720	1727	1727	1717	1711	1690	1691	1693	1686	1689	1717	1722	1722	1717	1708	1706	1696	1675	1662	1655	1651	1643	1646
1784	1778	1773	1781	1789	1792	1785	1770	1739	1732	1735	1741	1765	1788	1796	1803	1806	1814	1816	1813	1811	1817	1775	1765	1754	1740	1725	1715	1713	1692	1671	1661	1649	1649	1650	1651	1665	1671	1668	1663	1660	1659	1648	1642	1639	1630	1617	1615	1643	1646
1782	1771	1760	1754	1760	1763	1763	1770	1739	1732	1735	1742	1759	1772	1778	1784	1788	1795	1794	1782	1777	1781	1775	1760	1742	1729	1717	1693	1671	1643	1629	1620	1624	1626	1627	1628	1621	1621	1620	1619	1617	1617	1613	1609	1639	1630	1617	1615	1606	1601
1756	1749	1760	1754	1760	1763	1763	1754	1732	1719	1715	1718	1735	1744	1758	1765	1770	1776	1772	1757	1747	1746	1728	1713	1695	1682	1673	1648	1632	1617	1605	1595	1592	1595	1596	1598	1606	1603	1603	1619	1617	1617	1613	1609	1602	1596	1590	1583	1575	1569
1756	1749	1744	1733	1730	1732	1733	1725	1710	1698	1691	1693	1706	1714	1726	1739	1749	1737	1713	1694	1689	1681	1653	1644	1637	1629	1612	1605	1595	1590	1580	1575	1567	1568	1569	1598	1606	1603	1603	1599	1596	1587	1590	1584	1580	1573	1570	1562	1558	1555
1752	1746	1744	1733	1725	1721	1721	1704	1694	1683	1675	1673	1684	1690	1702	1719	1732	1714	1689	1666	1655	1632	1625	1619	1613	1603	1585	1577	1573	1567	1580	1575	1567	1568	1569	1567	1572	1571	1566	1561	1559	1561	1563	1560	1558	1550	1547	1545	1542	1540
1756	1749	1741	1736	1728	1718	1710	1688	1679	1669	1662	1660	1665	1669	1684	1702	1719	1714	1678	1653	1639	1617	1609	1605	1597	1588	1585	1577	1573	1567	1560	1556	1553	1554	1554	1551	1547	1545	1544	1542	1543	1544	1545	1545	1542	1535	1532	1529	1523	1519
1762	1755	1743	1737	1723	1709	1699	1668	1663	1660	1653	1648	1643	1643	1652	1668	1698	1685	1653	1630	1619	1617	1609	1605	1597	1588	1570	1564	1559	1553	1549	1541	1541	1544	1547	1545	1543	1541	1539	1536	1534	1534	1536	1536	1534	1525	1519	1513	1510	1510
1762	1753	1741	1731	1719	1704	1690	1665	1660	1652	1640	1630	1623	1621	1615	1619	1625	1685	1653	1630	1619	1601	1593	1589	1586	1580	1565	1557	1550	1545	1536	1533	1530	1530	1532	1536	1534	1531	1530	1529	1527	1525	1524	1526	1525	1515	1508	1504	1502	1502
1763	1747	1731	1724	1717	1708	1694	1662	1655	1644	1631	1609	1623	1621	1615	1619	1625	1618	1608	1603	1596	1584	1577	1574	1576	1573	1564	1560	1551	1542	1531	1525	1518	1515	1514	1512	1510	1510	1508	1511	1512	1512	1512	1512	1508	1503	1496	1494	1496	1495
1749	1730	1716	1713	1709	1703	1681	1661	1655	1644	1631	1609	1608	1607	1603	1604	1601	1596	1590	1589	1581	1571	1565	1560	1559	1561	1559	1553	1550	1541	1529	1522	1512	1507	1502	1495	1495	1495	1493	1490	1491	1492	1492	1490	1488	1503	1496	1494	1496	1495
1721	1712	1698	1713	1709	1703	1681	1661	1643	1630	1619	1601	1600	1598	1596	1595	1588	1584	1580	1574	1565	1562	1554	1548	1546	1545	1542	1538	1538	1538	1531	1521	1509	1504	1499	1485	1482	1479	1476	1467	1466	1492	1492	1490	1488	1484	1481	1483	1488	1492
1721	1702	1698	1698	1697	1693	1679	1664	1641	1618	1603	1593	1591	1591	1590	1589	1579	1576	1573	1568	1558	1555	1550	1545	1538	1530	1532	1536	1539	1537	1531	1516	1505	1499	1491	1487	1482	1479	1476	1467	1466	1465	1463	1461	1467	1467	1468	1470	1473	1479
1705	1689	1683	1678	1673	1671	1665	1652	1636	1609	1594	1582	1582	1583	1584	1578	1574	1572	1570	1565	1550	1544	1541	1537	1532	1523	1518	1520	1522	1524	1513	1504	1505	1499	1491	1487	1477	1473	1471	1455	1451	1449	1446	1446	1457	1460	1460	1463	1462	1461
1684	1671	1664	1659	1652	1646	1638	1626	1612	1596	1582	1580	1579	1580	1580	1574	1570	1565	1561	1557	1547	1542	1537	1534	1529	1520	1514	1520	1522	1522	1513	1504	1499	1496	1484	1481	1479	1475	1471	1458	1450	1444	1438	1436	1449	1451	1450	1452	1452	1451
1665	1652	1645	1641	1639	1632	1615	1606	1599	1591	1581	1578	1578	1579	1580	1573	1569	1564	1557	1554	1548	1544	1544	1534	1523	1520	1514	1510	1509	1503	1496	1491	1485	1483	1477	1476	1476	1475	1474	1469	1464	1455	1445	1426	1424	1420	1417	1420	1432	1434
1658	1645	1640	1637	1631	1616	1609	1601	1597	1591	1581	1579	1579	1579	1582	1575	1572	1566	1557	1554	1548	1544	1544	1543	1527	1520	1515	1511	1505	1495	1493	1488	1486	1483	1476	1474	1474	1472	1469	1467	1463	1456	1442	1420	1406	1397	1395	1389	1386	1393
1661	1646	1641	1638	1632	1612	1605	1597	1592	1586	1582	1582	1578	1576	1582	1575	1572	1566	1561	1553	1550	1545	1542	1539	1527	1521	1514	1510	1503	1489	1488	1486	1486	1484	1478	1476	1474	1472	1468	1463	1455	1436	1425	1401	1390	1382	1374	1371	1367	1365
1649	1640	1635	1631	1624	1612	1609	1595	1587	1586	1582	1582	1578	1576	1578	1576	1572	1568	1565	1555	1549	1543	1537	1530	1518	1514	1509	1504	1499	1491	1489	1486	1484	1477	1477	1476	1474	1473	1471	1460	1435	1411	1401	1386	1378	1372	1374	1371	1367	1365
1634	1629	1626	1620	1613	1612	1609	1595	1587	1584	1582	1582	1578	1573	1572	1573	1575	1571	1569	1559	1550	1543	1538	1529	1513	1507	1501	1498	1494	1491	1489	1485	1482	1474	1473	1473	1473	1472	1468	1444	1416	1401	1401	1386	1378	1372	1365	1359	1356	1352
1634	1629	1626	1620	1613	1602	1597	1587	1585	1582	1580	1578	1576	1573	1572	1576	1577	1572	1571	1563	1554	1544	1539	1529	1511	1503	1496	1491	1486	1484	1483	1480	1477	1472	1468	1468	1468	1472	1468	1444	1416	1401	1382	1375	1369	1363	1360	1351	1347	1343
1628	1621	1620	1618	1610	1592	1585	1580	1582	1580	1578	1578	1577	1576	1573	1580	1582	1576	1577	1572	1564	1549	1535	1514	1506	1501	1494	1488	1475	1471	1470	1470	1470	1472	1468	1468	1468	1468	1461	1426	1406	1391	1373	1368	1362	1358	1355	1349	1345	1340
1623	1618	1612	1606	1587	1582	1578	1577	1579	1577	1574	1572	1572	1572	1575	1582	1586	1585	1585	1580	1566	1549	1535	1517	1509	1505	1498	1490	1475	1471	1470	1470	1470	1464	1461	1457	1453	1448	1439	1421	1407	1396	1379	1371	1365	1364	1360	1353	1348	1343
1622	1616	1609	1602	1587	1583	1579	1579	1578	1582	1576	1573	1569	1568	1571	1580	1587	1590	1586	1583	1571	1557	1544	1520	1509	1505	1498	1490	1473	1469	1468	1468	1467	1458	1455	1451	1443	1431	1426	1424	1418	1407	1386	1380	1373	1371	1367	1359	1354	1350
1630	1621	1613	1608	1596	1591	1584	1581	1580	1580	1578	1575	1569	1563	1562	1567	1577	1585	1584	1583	1571	1557	1544	1520	1514	1510	1503	1494	1479	1473	1470	1468	1461	1456	1453	1448	1441	1430	1427	1424	1420	1408	1393	1387	1381	1378	1369	1366	1362	1360
1645	1638	1635	1630	1607	1601	1595	1591	1590	1583	1580	1576	1571	1561	1559	1567	1577	1585	1584	1583	1579	1568	1554	1529	1520	1513	1506	1496	1491	1487	1481	1476	1468	1464	1460	1454	1447	1434	1431	1427	1422	1415	1402	1397	1393	1384	1378	1379	1377	1374
1673	1673	1671	1670	1629	1612	1605	1602	1598	1595	1580	1576	1571	1561	1559	1559	1562	1574	1580	1580	1578	1572	1560	1540	1530	1523	1514	1503	1499	1493	1489	1485	1478	1475	1474	1473	1466	1449	1445	1441	1439	1437	1436	1436	1430	1417	1393	1391	1377	1374
1739	1733	1731	1717	1683	1648	1605	1602	1598	1595	1592	1585	1578	1566	1564	1566	1572	1581	1584	1581	1576	1571	1556	1549	1539	1533	1529	1514	1509	1505	1501	1496	1492	1493	1500	1508	1505	1481	1474	1476	1473	1482	1475	1436	1430	1417	1393	1391	1391	1390
1768	1733	1731	1717	1683	1648	1627	1622	1619	1615	1606	1596	1587	1577	1579	1587	1591	1591	1586	1582	1579	1574	1568	1562	1553	1548	1545	1531	1530	1529	1525	1519	1519	1525	1534	1534	1533	1536	1543	1476	1473	1482	1475	1469	1460	1453	1419	1414	1410	1410
1768	1761	1757	1750	1713	1687	1664	1645	1630	1624	1619	1609	1601	1588	1590	1597	1604	1603	1601	1601	1600	1595	1593	1589	1584	1578	1570	1564	1564	1568	1569	1553	1557	1562	1534	1534	1533	1536	1543	1551	1546	1518	1512	1501	1484	1472	1454	1446	1436	1442
1833	1806	1794	1785	1760	1736	1715	1682	1651	1641	1631	1621	1609	1602	1599	1607	1619	1629	1633	1640	1640	1629	1621	1621	1618	1612	1604	1614	1624	1626	1569	1553	1557	1562	1560	1560	1579	1588	1588	1585	1577	1554	1537	1514	1504	1487	1482	1473	1459	1463
1881	1873	1852	1822	1808	1777	1734	1703	1672	1657	1650	1642	1628	1623	1619	1628	1643	1676	1684	1686	1688	1679	1645	1642	1640	1612	1607	1614	1624	1626	1624	1602	1601	1593	1591	1594	1615	1624	1640	1614	1597	1574	1557	1531	1520	1501	1493	1483	1475	1477
1880	1876	1864	1834	1809	1772	1736	1698	1689	1682	1680	1675	1663	1652	1652	1656	1669	1707	1727	1733	1723	1679	1645	1642	1640	1634	1650	1661	1668	1666	1658	1642	1641	1638	1640	1650	1672	1689	1698	1674	1618	1586	1570	1552	1535	1515	1504	1497	1499	1501
1870	1868	1847	1828	1794	1764	1745	1719	1712	1710	1715	1709	1691	1680	1679	1678	1669	1707	1727	1733	1723	1690	1675	1662	1658	1659	1677	1687	1688	1688	1687	1687	1690	1689	1691	1713	1726	1730	1724	1697	1644	1608	1593	1573	1556	1530	1523	1519	1524	1532
1861	1861	1841	1821	1797	1785	1770	1756	1754	1761	1765	1760	1691	1680	1679	1678	1694	1715	1741	1759	1762	1719	1707	1691	1684	1682	1693	1704	1713	1719	1732	1751	1765	1770	1763	1762	1755	1746	1735	1695	1637	1616	1603	1584	1566	1540	1537	1537	1540	1541
1852	1851	1834	1823	1813	1807	1799	1756	1754	1761	1765	1760	1759	1729	1711	1706	1712	1728	1752	1775	1791	1764	1750	1740	1731	1722	1719	1734	1750	1788	1828	1826	1824	1816	1802	1775	1764	1753	1742	1689	1642	1628	1614	1594	1566	1540	1537	1537	1540	1564
1835	1833	1824	1823	1813	1807	1799	1786	1786	1789	1792	1801	1801	1787	1760	1742	1737	1750	1763	1789	1804	1807	1793	1772	1752	1744	1758	1775	1793	1822	1862	1857	1844	1828	1812	1784	1770	1756	1725	1687	1642	1628	1614	1594	1562	1554	1552	1556	1559	1592
1835	1833	1824	1818	1811	1807	1796	1793	1792	1793	1794	1799	1800	1793	1780	1765	1755	1763	1775	1792	1801	1813	1804	1788	1774	1779	1802	1813	1817	1831	1867	1868	1859	1839	1820	1784	1770	1756	1725	1687	1655	1642	1626	1605	1572	1569	1564	1566	1574	1608
1813	1810	1807	1801	1797	1792	1786	1785	1784	1784	1783	1785	1786	1787	1783	1777	1765	1763	1769	1782	1800	1797	1797	1793	1788	1816	1822	1820	1815	1819	1850	1868	1859	1839	1820	1794	1770	1752	1721	1679	1666	1653	1642	1620	1586	1581	1581	1590	1601	1637
1795	1792	1790	1786	1781	1777	1772	1771	1770	1770	1770	1770	1771	1772	1769	1761	1745	1744	1747	1762	1777	1765	1766	1772	1783	1811	1822	1820	1815	1819	1850	1865	1868	1854	1818	1800	1773	1751	1728	1694	1680	1670	1651	1634	1607	1606	1616	1629	1651	1677
1785	1778	1776	1773	1768	1763	1758	1758	1758	1758	1756	1756	1758	1757	1755	1728	1724	1724	1728	1736	1740	1739	1766	1772	1783	1811	1809	1802	1799	1799	1823	1842	1858	1866	1837	1815	1786	1766	1753	1741	1733	1718	1665	1641	1624	1631	1653	1674	1688	1715
1771	1764	1760	1758	1753	1748	1745	1745	1746	1745	1739	1735	1734	1739	1737	1707	1696	1724	1728	1736	1740	1739	1740	1749	1769	1794	1790	1785	1788	1793	1804	1818	1831	1858	1850	1831	1803	1785	1776	1784	1769	1746	1695	1654	1674	1686	1709	1719	1734	1771
1751	1749	1748	1745	1734	1729	1735	1737	1733	1728	1718	1712	1705	1739	1737	1707	1696	1697	1699	1697	1705	1712	1717	1726	1755	1765	1770	1772	1777	1790	1799	1809	1816	1834	1875	1865	1848	1835	1829	1807	1790	1771	1700	1709	1737	1750	1754	1757	1777	1810
1735	1734	1735	1735	1724	1707	1719	1725	1733	1728	1718	1712	1705	1703	1705	1682	1672	1673	1672	1671	1683	1690	1698	1714	1739	1748	1755	1758	1766	1784	1793	1801	1806	1817	1876	1891	1891	1883	1845	1824	1808	1775	1714	1760	1771	1773	1754	1757	1777	1810
1716	1711	1713	1719	1724	1707	1719	1725	1724	1719	1698	1688	1675	1668	1671	1652	1652	1651	1653	1665	1670	1676	1687	1704	1725	1735	1741	1746	1756	1777	1785	1793	1801	1813	1863	1886	1898	1893	1845	1821	1808	1775	1714	1760	1771	1773	1772	1783	1812	1853
1715	1711	1713	1719	1718	1675	1679	1693	1702	1698	1678	1664	1650	1644	1637	1630	1626	1627	1636	1658	1661	1668	1676	1690	1711	1720	1725	1734	1747	1772	1782	1791	1802	1841	1857	1874	1894	1893	1845	1821	1808	1757	1721	1772	1783	1789	1798	1810	1843	1883
1699	1687	1687	1692	1694	1654	1646	1647	1650	1653	1661	1651	1631	1621	1610	1607	1609	1615	1628	1653	1660	1663	1670	1679	1696	1705	1716	1729	1742	1769	1782	1798	1802	1841	1857	1874	1894	1898	1849	1804	1791	1780	1759	1787	1802	1816	1830	1873	1886	1901
1679	1670	1664	1666	1674	1641	1631	1627	1624	1625	1624	1614	1607	1602	1599	1598	1603	1609	1626	1649	1655	1659	1666	1675	1692	1702	1715	1726	1757	1769	1782	1798	1811	1837	1850	1866	1892	1903	1868	1814	1793	1797	1806	1815	1829	1854	1891	1919	1922	1933
1659	1655	1643	1641	1641	1619	1609	1605	1602	1599	1597	1592	1587	1585	1586	1591	1600	1610	1624	1644	1651	1658	1666	1684	1692	1702	1715	1726	1754	1767	1781	1796	1808	1834	1844	1855	1884	1902	1879	1832	1812	1811	1826	1846	1871	1917	1944	1945	1958	1961
1641	1634	1624	1613	1595	1590	1583	1580	1578	1580	1578	1575	1571	1570	1578	1589	1602	1611	1621	1644	1651	1658	1666	1682	1691	1700	1711	1723	1751	1763	1776	1790	1801	1830	1840	1854	1873	1894	1885	1858	1841	1844	1851	1883	1923	1953	1954	1953	1957	1948
1624	1619	1608	1595	1576	1568	1565	1563	1559	1559	1559	1559	1559	1562	1578	1589	1602	1611	1632	1638	1648	1659	1666	1682	1691	1702	1713	1725	1754	1765	1778	1790	1802	1829	1842	1856	1885	1905	1900	1883	1876	1880	1884	1917	1956	1983	1979	1952	1943	1931
1601	1605	1595	1583	1560	1551	1546	1544	1539	1538	1559	1559	1559	1566	1571	1579	1591	1601	1629	1634	1639	1649	1659	1678	1689	1703	1715	1726	1757	1767	1781	1792	1818	1831	1845	1864	1883	1911	1917	1912	1895	1898	1923	1949	1972	1996	2006	1952	1943	1931
1561	1569	1566	1565	1547	1551	1546	1544	1539	1538	1542	1544	1546	1555	1561	1567	1573	1585	1618	1622	1624	1628	1639	1671	1684	1700	1717	1741	1755	1767	1781	1795	1821	1835	1850	1873	1890	1912	1923	1926	1921	1929	1923	1949	1972	1996	2007	1977	1950	1931
1534	1569	1566	1565	1547	1537	1529	1526	1517	1516	1520	1524	1527	1541	1547	1551	1554	1561	1593	1603	1609	1615	1622	1655	1674	1698	1713	1742	1760	1774	1787	1801	1827	1837	1849	1865	1882	1914	1923	1926	1921	1947	1963	1980	2003	2014	2033	2016	1991	1971
1534	1540	1542	1541	1534	1524	1516	1511	1502	1502	1509	1513	1514	1528	1532	1536	1540	1547	1573	1586	1595	1604	1628	1646	1667	1694	1718	1752	1768	1781	1792	1803	1827	1837	1849	1865	1882	1914	1924	1932	1940	1962	1979	2000	2015	2025	2044	2038	2021	2006
1513	1518	1521	1520	1517	1510	1500	1493	1488	1487	1492	1498	1502	1512	1517	1521	1527	1541	1552	1567	1582	1593	1629	1648	1666	1690	1710	1757	1768	1781	1792	1803	1827	1841	1851	1865	1897	1910	1922	1933	1946	1969	1985	1999	2011	2025	2048	2047	2035	2018
1494	1499	1501	1505	1500	1494	1487	1482	1476	1476	1474	1480	1489	1498	1503	1509	1516	1528	1538	1549	1565	1578	1633	1664	1666	1690	1710	1757	1768	1777	1788	1811	1826	1839	1851	1864	1890	1902	1915	1930	1946	1971	1986	1999	2009	2022	2040	2039	2028	1999
1480	1484	1487	1491	1488	1483	1478	1472	1467	1468	1465	1473	1483	1485	1492	1501	1507	1520	1528	1538	1565	1578	1633	1664	1688	1695	1704	1742	1758	1771	1782	1808	1823	1834	1846	1859	1882	1899	1914	1928	1944	1974	1995	2010	2018	2030	2021	2004	1988	1963
1461	1469	1475	1474	1474	1473	1469	1463	1457	1456	1458	1466	1472	1473	1480	1501	1507	1520	1528	1538	1552	1565	1638	1682	1692	1700	1726	1742	1756	1768	1781	1806	1819	1832	1844	1856	1881	1896	1910	1923	1945	1974	1996	2010	2018	2033	2031	2013	1994	1964
1449	1454	1462	1464	1462	1462	1459	1451	1448	1447	1449	1466	1472	1473	1480	1488	1496	1510	1519	1530	1542	1554	1637	1676	1687	1703	1737	1759	1770	1775	1785	1806	1821	1832	1842	1856	1879	1893	1909	1923	1954	1967	1982	1997	2011	2029	2034	2025	1994	1964
1444	1445	1451	1450	1451	1452	1459	1451	1448	1447	1449	1456	1461	1465	1471	1477	1487	1502	1510	1519	1531	1570	1611	1656	1683	1702	1747	1768	1775	1782	1791	1812	1821	1834	1845	1856	1872	1893	1911	1925	1953	1966	1979	1995	2011	2029	2034	2025	1997	1975
1437	1443	1451	1450	1451	1452	1452	1446	1442	1442	1444	1450	1452	1457	1463	1470	1486	1493	1501	1509	1524	1571	1603	1638	1673	1701	1748	1771	1786	1793	1798	1814	1823	1836	1842	1853	1868	1885	1898	1925	1953	1966	1979	1995	2004	2018	2021	2027	2005	1978
1437	1443	1441	1438	1436	1439	1441	1437	1437	1435	1436	1441	1447	1451	1455	1461	1477	1486	1495	1503	1518	1568	1598	1630	1657	1683	1725	1750	1782	1798	1809	1814	1817	1816	1817	1853	1868	1885	1898	1913	1949	1964	1978	1987	1994	2003	2006	2010	1997	1971
1424	1432	1432	1430	1428	1428	1428	1431	1431	1429	1430	1438	1443	1446	1449	1453	1472	1481	1489	1499	1514	1567	1594	1616	1636	1657	1695	1711	1738	1783	1809	1814	1817	1816	1817	1863	1881	1890	1906	1927	1952	1964	1965	1964	1978	1985	1988	1993	1990	1977
1419	1421	1429	1428	1426	1424	1418	1424	1426	1426	1425	1434	1437	1442	1445	1448	1466	1475	1484	1494	1510	1554	1580	1609	1625	1657	1695	1711	1738	1783	1794	1790	1783	1781	1793	1854	1875	1889	1912	1932	1952	1950	1941	1940	1961	1967	1972	1977	1983	1977
1409	1402	1421	1420	1420	1414	1407	1413	1416	1418	1421	1424	1426	1432	1438	1441	1456	1467	1478	1487	1521	1554	1580	1609	1625	1657	1674	1692	1709	1743	1767	1753	1752	1760	1777	1850	1866	1879	1888	1926	1931	1927	1924	1931	1946	1950	1956	1965	1974	1977
1397	1390	1396	1400	1399	1397	1389	1400	1408	1413	1413	1413	1416	1418	1427	1436	1449	1467	1478	1487	1521	1536	1552	1579	1609	1650	1664	1679	1690	1703	1720	1707	1719	1740	1803	1836	1851	1855	1854	1870	1884	1890	1898	1913	1927	1934	1941	1953	1966	1977
1398	1384	1386	1385	1387	1386	1385	1388	1396	1400	1403	1405	1416	1418	1427	1441	1449	1460	1469	1477	1508	1525	1537	1552	1574	1638	1654	1668	1677	1677	1665	1674	1695	1724	1793	1810	1822	1826	1827	1836	1846	1856	1868	1891	1905	1917	1929	1943	1966	1977
1409	1387	1383	1379	1378	1378	1383	1383	1396	1400	1403	1405	1406	1413	1420	1438	1441	1451	1460	1466	1498	1515	1529	1541	1555	1609	1629	1648	1654	1642	1654	1666	1685	1712	1771	1790	1796	1799	1803	1816	1823	1833	1849	1864	1893	1917	1929	1943	1966	1973
1413	1392	1381	1379	1378	1378	1383	1383	1383	1386	1387	1392	1397	1403	1408	1424	1427	1437	1444	1452	1484	1500	1516	1529	1560	1576	1590	1608	1619	1620	1645	1651	1663	1698	1738	1755	1767	1773	1781	1792	1823	1833	1849	1877	1893	1910	1924	1934	1946	1956
1413	1392	1381	1378	1377	1381	1382	1378	1376	1378	1383	1386	1387	1393	1399	1409	1412	1419	1429	1442	1473	1486	1502	1514	1540	1555	1567	1584	1594	1599	1614	1633	1656	1685	1718	1732	1767	1773	1786	1792	1801	1814	1827	1851	1875	1901	1915	1912	1915	1920
1409	1391	1379	1375	1375	1377	1375	1374	1372	1374	1377	1377	1378	1382	1388	1399	1402	1409	1420	1449	1465	1479	1491	1503	1532	1545	1550	1553	1560	1580	1594	1633	1656	1685	1718	1732	1748	1756	1763	1767	1778	1788	1800	1831	1846	1861	1873	1888	1888	1897
1398	1387	1378	1371	1370	1369	1367	1364	1364	1364	1362	1361	1364	1367	1374	1388	1394	1402	1409	1441	1458	1468	1478	1488	1518	1527	1525	1553	1560	1580	1594	1614	1636	1678	1689	1709	1727	1738	1743	1748	1759	1768	1779	1806	1827	1839	1847	1851	1862	1869
1394	1384	1374	1367	1366	1364	1361	1357	1355	1354	1347	1349	1350	1352	1367	1377	1385	1393	1398	1428	1443	1454	1478	1488	1518	1527	1525	1530	1541	1564	1579	1602	1619	1652	1666	1684	1701	1720	1720	1728	1739	1747	1754	1769	1786	1800	1809	1822	1829	1838
1395	1386	1376	1364	1361	1358	1354	1350	1345	1335	1332	1334	1337	1340	1356	1366	1373	1382	1398	1428	1443	1454	1463	1473	1491	1496	1502	1515	1536	1546	1562	1588	1607	1630	1646	1656	1665	1673	1699	1711	1720	1726	1733	1746	1756	1767	1775	1799	1809	1815
1393	1385	1376	1368	1360	1353	1350	1343	1335	1322	1318	1318	1321	1340	1356	1366	1373	1382	1391	1413	1424	1433	1445	1468	1470	1476	1489	1502	1521	1531	1548	1568	1588	1603	1615	1633	1648	1660	1686	1699	1704	1708	1724	1731	1739	1748	1754	1773	1781	1792
1399	1394	1382	1373	1349	1345	1344	1334	1328	1322	1318	1318	1321	1326	1341	1351	1360	1371	1381	1394	1407	1416	1424	1442	1447	1457	1469	1483	1503	1513	1525	1541	1563	1590	1607	1623	1633	1660	1671	1680	1682	1686	1707	1713	1719	1727	1754	1773	1781	1792
1404	1398	1387	1372	1349	1345	1344	1334	1328	1317	1309	1309	1310	1318	1329	1338	1347	1357	1376	1381	1389	1398	1407	1422	1428	1440	1453	1464	1485	1499	1514	1534	1557	1581	1593	1605	1613	1644	1653	1657	1662	1672	1707	1713	1719	1727	1734	1752	1763	1775
1404	1398	1387	1372	1349	1341	1334	1330	1325	1313	1306	1307	1307	1315	1318	1326	1335	1344	1365	1371	1378	1386	1393	1407	1415	1426	1436	1443	1470	1486	1503	1519	1551	1560	1577	1588	1598	1644	1653	1657	1662	1672	1689	1691	1697	1706	1713	1737	1748	1761
1409	1401	1383	1367	1343	1336	1328	1322	1320	1311	1304	1304	1306	1308	1311	1314	1320	1329	1347	1357	1364	1371	1379	1394	1402	1409	1414	1440	1460	1475	1487	1502	1529	1560	1577	1588	1598	1626	1631	1635	1647	1659	1667	1670	1678	1687	1714	1725	1736	1750
1399	1395	1374	1360	1338	1329	1322	1315	1309	1307	1304	1301	1297	1302	1307	1306	1311	1319	1332	1341	1351	1358	1368	1382	1390	1395	1397	1425	1460	1475	1487	1502	1529	1537	1544	1560	1573	1594	1600	1615	1623	1629	1632	1641	1657	1674	1699	1712	1723	1737
1386	1377	1363	1350	1332	1325	1319	1312	1304	1301	1299	1299	1294	1295	1303	1304	1307	1311	1323	1332	1342	1350	1368	1373	1390	1395	1397	1425	1446	1459	1468	1475	1495	1506	1515	1532	1544	1565	1570	1581	1590	1604	1617	1629	1643	1658	1684	1699	1711	1727
1392	1379	1367	1347	1339	1331	1324	1317	1304	1299	1297	1296	1294	1291	1297	1299	1301	1305	1316	1332	1342	1350	1368	1373	1379	1381	1388	1414	1426	1436	1448	1458	1480	1488	1500	1513	1531	1542	1553	1564	1573	1592	1608	1621	1635	1649	1675	1688	1701	1715
1403	1385	1371	1354	1349	1343	1337	1327	1305	1299	1293	1292	1292	1283	1286	1299	1301	1309	1316	1327	1335	1340	1355	1361	1364	1369	1378	1401	1410	1422	1433	1441	1465	1474	1485	1498	1518	1529	1537	1546	1556	1584	1600	1612	1626	1638	1664	1676	1689	1702
1416	1399	1372	1353	1348	1344	1340	1329	1307	1298	1293	1292	1288	1283	1286	1294	1299	1306	1314	1322	1326	1329	1343	1348	1354	1358	1367	1389	1398	1410	1420	1438	1445	1454	1470	1484	1504	1513	1521	1532	1546	1577	1590	1602	1615	1628	1652	1664	1689	1702
1424	1411	1392	1351	1346	1341	1340	1329	1307	1298	1295	1293	1282	1279	1280	1287	1296	1304	1309	1315	1317	1321	1335	1339	1344	1349	1367	1377	1388	1398	1408	1425	1434	1443	1456	1471	1490	1500	1512	1528	1542	1568	1580	1602	1615	1640	1652	1664	1676	1688
1429	1411	1392	1351	1346	1341	1336	1307	1303	1297	1294	1292	1281	1279	1280	1289	1295	1300	1306	1309	1311	1316	1326	1329	1334	1338	1353	1364	1374	1386	1397	1412	1422	1429	1439	1452	1477	1491	1512	1528	1554	1568	1580	1590	1603	1628	1640	1652	1664	1675
1429	1409	1366	1352	1345	1338	1334	1315	1308	1300	1292	1290	1279	1279	1284	1290	1293	1294	1299	1302	1305	1317	1320	1323	1326	1330	1342	1352	1362	1372	1384	1396	1401	1410	1439	1452	1477	1491	1506	1517	1541	1554	1565	1577	1591	1614	1626	1638	1648	1658
1429	1413	1375	1361	1353	1348	1342	1330	1326	1316	1299	1291	1281	1282	1286	1287	1289	1290	1293	1295	1298	1311	1313	1317	1319	1324	1337	1343	1352	1372	1384	1396	1401	1410	1420	1450	1468	1481	1494	1505	1526	1539	1551	1564	1578	1600	1613	1624	1633	1642
1434	1427	1417	1387	1367	1363	1356	1342	1338	1330	1311	1302	1288	1283	1279	1277	1277	1287	1290	1291	1298	1305	1306	1309	1313	1324	1337	1343	1352	1362	1378	1383	1388	1397	1409	1437	1459	1473	1480	1489	1515	1529	1543	1554	1567	1589	1602	1612	1619	1633
1453	1448	1452	1420	1386	1376	1371	1352	1345	1337	1324	1304	1295	1290	1285	1280	1273	1276	1285	1291	1298	1305	1306	1309	1313	1318	1332	1337	1342	1349	1361	1368	1379	1387	1398	1426	1440	1452	1462	1474	1503	1518	1532	1543	1563	1574	1586	1595	1603	1614
1474	1467	1474	1455	1423	1394	1375	1366	1355	1341	1328	1307	1297	1291	1288	1284	1273	1276	1285	1291	1298	1309	1309	1308	1309	1322	1326	1328	1331	1334	1347	1356	1369	1376	1387	1413	1426	1436	1451	1465	1491	1505	1519	1528	1549	1559	1569	1577	1584	1597
1508	1494	1486	1481	1456	1417	1389	1379	1372	1366	1350	1307	1297	1291	1288	1284	1275	1276	1283	1291	1304	1309	1311	1313	1312	1318	1317	1317	1319	1325	1336	1345	1354	1362	1376	1399	1412	1426	1438	1466	1479	1490	1505	1515	1537	1544	1555	1561	1569	1597
1562	1513	1502	1484	1457	1435	1408	1379	1372	1366	1350	1315	1304	1297	1290	1288	1270	1273	1281	1288	1300	1306	1308	1310	1308	1306	1302	1302	1306	1312	1328	1334	1340	1349	1374	1385	1400	1415	1426	1451	1463	1476	1489	1500	1537	1544	1555	1561	1569	1583
1585	1562	1502	1484	1457	1435	1408	1397	1387	1376	1367	1335	1322	1313	1303	1288	1281	1276	1275	1280	1293	1297	1299	1298	1288	1279	1286	1289	1293	1302	1314	1322	1330	1338	1360	1370	1383	1400	1411	1436	1463	1476	1489	1500	1522	1528	1535	1543	1559	1568
1585	1562	1535	1511	1473	1461	1432	1417	1403	1387	1380	1359	1348	1337	1320	1301	1294	1287	1282	1277	1282	1283	1281	1276	1272	1270	1275	1277	1283	1293	1299	1311	1318	1326	1349	1370	1383	1400	1411	1436	1447	1459	1473	1489	1505	1509	1515	1524	1543	1551
1615	1588	1560	1541	1515	1493	1455	1441	1430	1414	1391	1377	1363	1355	1344	1323	1312	1303	1296	1287	1272	1267	1263	1261	1258	1262	1264	1267	1271	1280	1286	1311	1318	1326	1349	1359	1371	1383	1394	1421	1432	1446	1462	1486	1490	1492	1497	1508	1527	1534
1659	1631	1594	1578	1562	1509	1477	1458	1450	1436	1412	1398	1383	1374	1362	1343	1334	1328	1319	1302	1276	1267	1256	1245	1253	1254	1264	1267	1271	1280	1286	1296	1304	1312	1336	1345	1358	1369	1379	1405	1416	1429	1442	1465	1467	1470	1480	1491	1508	1515
1680	1652	1620	1607	1594	1540	1495	1477	1466	1453	1429	1415	1400	1388	1377	1352	1346	1339	1334	1301	1284	1271	1256	1245	1253	1254	1253	1257	1262	1268	1275	1282	1290	1297	1321	1331	1346	1357	1377	1389	1400	1413	1425	1439	1443	1454	1464	1472	1488	1499
1628	1619	1612	1609	1592	1551	1521	1495	1482	1471	1445	1433	1421	1408	1395	1373	1362	1339	1334	1301	1284	1271	1259	1248	1246	1248	1248	1251	1255	1260	1266	1275	1281	1292	1308	1322	1335	1345	1366	1377	1385	1396	1407	1421	1427	1437	1445	1453	1474	1483
1581	1578	1578	1578	1577	1564	1534	1514	1500	1484	1457	1445	1437	1408	1382	1373	1362	1350	1337	1316	1294	1279	1262	1251	1235	1237	1239	1246	1249	1253	1260	1263	1265	1281	1295	1311	1322	1330	1351	1361	1367	1376	1385	1405	1414	1419	1424	1449	1460	1469
1558	1558	1554	1553	1554	1554	1536	1525	1500	1469	1457	1445	1437	1426	1393	1383	1372	1360	1345	1320	1299	1283	1266	1254	1234	1230	1231	1236	1236	1243	1249	1255	1256	1270	1276	1286	1297	1308	1332	1344	1350	1357	1368	1386	1393	1399	1424	1449	1460	1469
1538	1535	1533	1534	1554	1554	1536	1525	1513	1477	1467	1456	1444	1434	1400	1388	1378	1370	1353	1311	1296	1281	1267	1245	1234	1230	1224	1226	1229	1233	1239	1243	1247	1254	1261	1269	1279	1287	1317	1329	1335	1357	1376	1386	1393	1399	1409	1431	1443	1453
[truncated: 458 more columns]
