# Supplementary material
Source: publisher figshare collection journal article supplement (https://frontiersin.figshare.com/ndownloader/files/31376017)
Supplement: Supplementary file 1 [file 31376017 › Source_code/readSpatialData.m]

function [topo mask nx ny] = readSpatialData

global topofile oceanmaskfile

    topo = dlmread(topofile);
    mask = dlmread(oceanmaskfile);
    topo(mask==0) = 0;
    [ny nx] = size(topo);
    
return
