# Supplementary material
Source: publisher figshare collection journal article supplement (https://frontiersin.figshare.com/ndownloader/files/31376017)
Supplement: Supplementary file 1 [file 31376017 › Source_code/SMB_DD.m]

function M = SMB_DD (s_elev)

global lapse_rate DD_melt_factor DD_precip DD_melt_temp Tsl

    T_surf = Tsl*ones(size(s_elev)) - lapse_rate * s_elev/1000;
    M = zeros(size(s_elev));

    M(T_surf>0) = -DD_melt_factor * T_surf(T_surf>0);
    M = ...
        M + DD_precip;
    
    
    
return
